# Supplementary material for: Mobilisation thresholds for coral rubble and consequences for windows of reef recovery
Source: Copernicus journal article supplement (doi:10.5194/bg-20-4339-2023), 2023-10-24
Supplement: Supplementary file 1 [file bg-20-4339-2023-supplement.pdf]

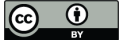

*Supplement of*

## **Mobilisation thresholds for coral rubble and consequences for windows of reef recovery**

**Tania M. Kenyon et al.**

*Correspondence to:* Tania M. Kenyon ([tania.kenyon@uq.net.au](mailto:tania.kenyon@uq.net.au))

The copyright of individual parts of the supplement might differ from the article licence.

## 1 Supplementary Material

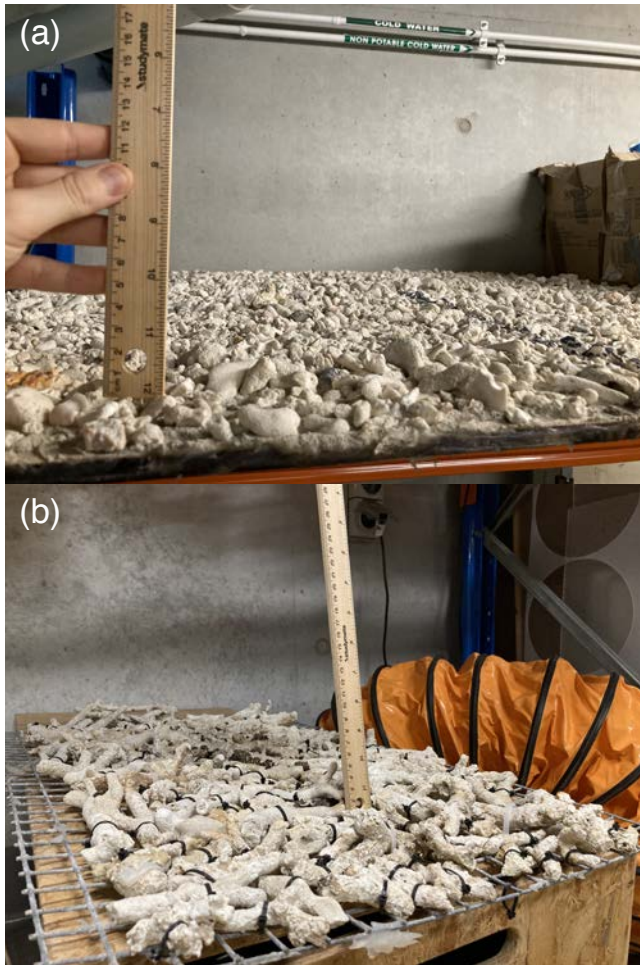

2

3 Figure S1 Rubble bases used in the wave flume for (a) 'free' not interlocked rubble pieces; and (b) interlocked rubble.

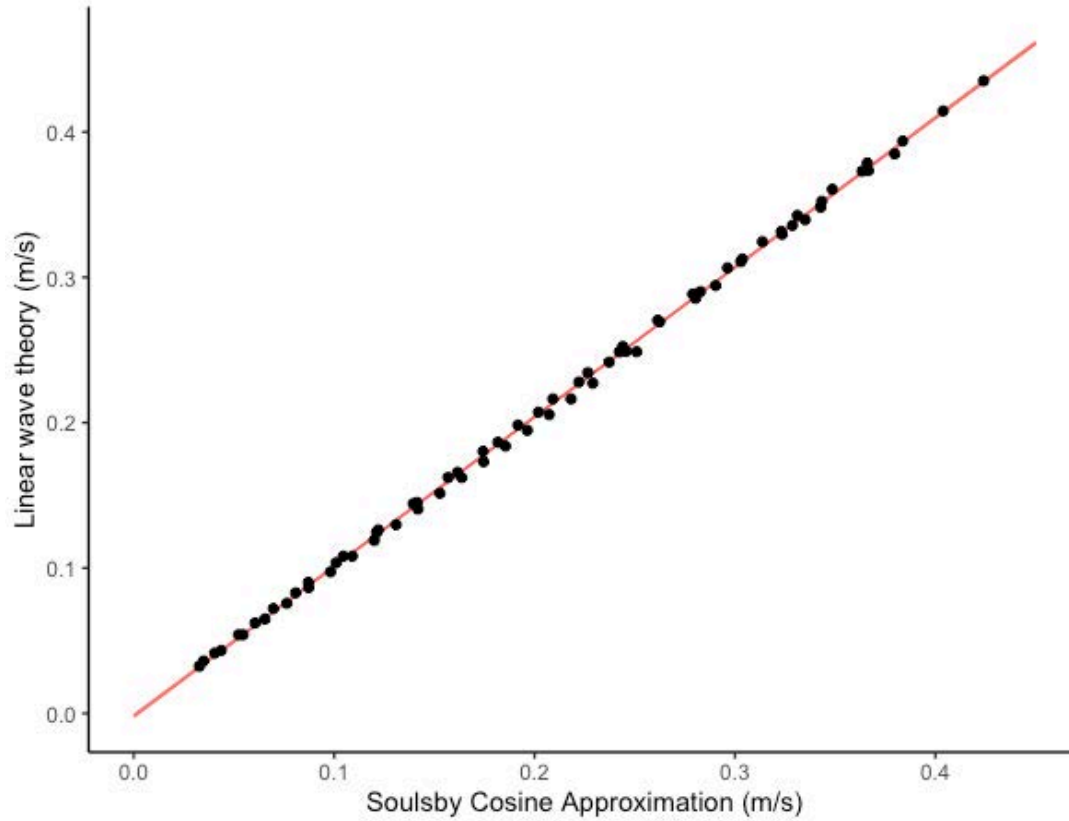

4

5 Figure S2: Relationship between the bottom orbital velocity estimated using the Soulsby Cosine Approximation (x axis) and Linear wave theory (y axis) for wave conditions used in  
6 the wave flume. Red line designates linear regression equation for relationship:  $y = -0.0018 + 1.0289x$  ( $R^2 = 0.999$ ).

7

8

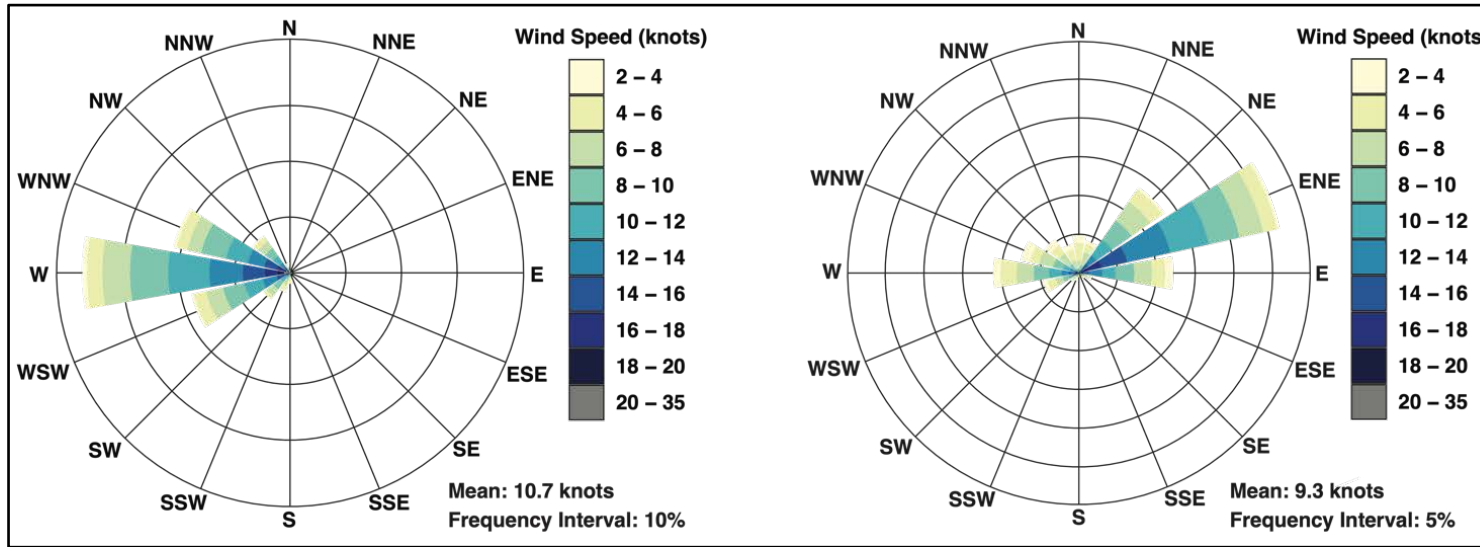

9 Figure S3 Windrose of mean wind speed (knots) and wind direction data measured at Hulhumale ranging 1985-2018 for western monsoon, showing monsoonal mean wind speed  
10 (left); and (right) north-eastern monsoon, showing monsoonal mean wind speed (Source: Maldives Meteorological Service, Government of Maldives).

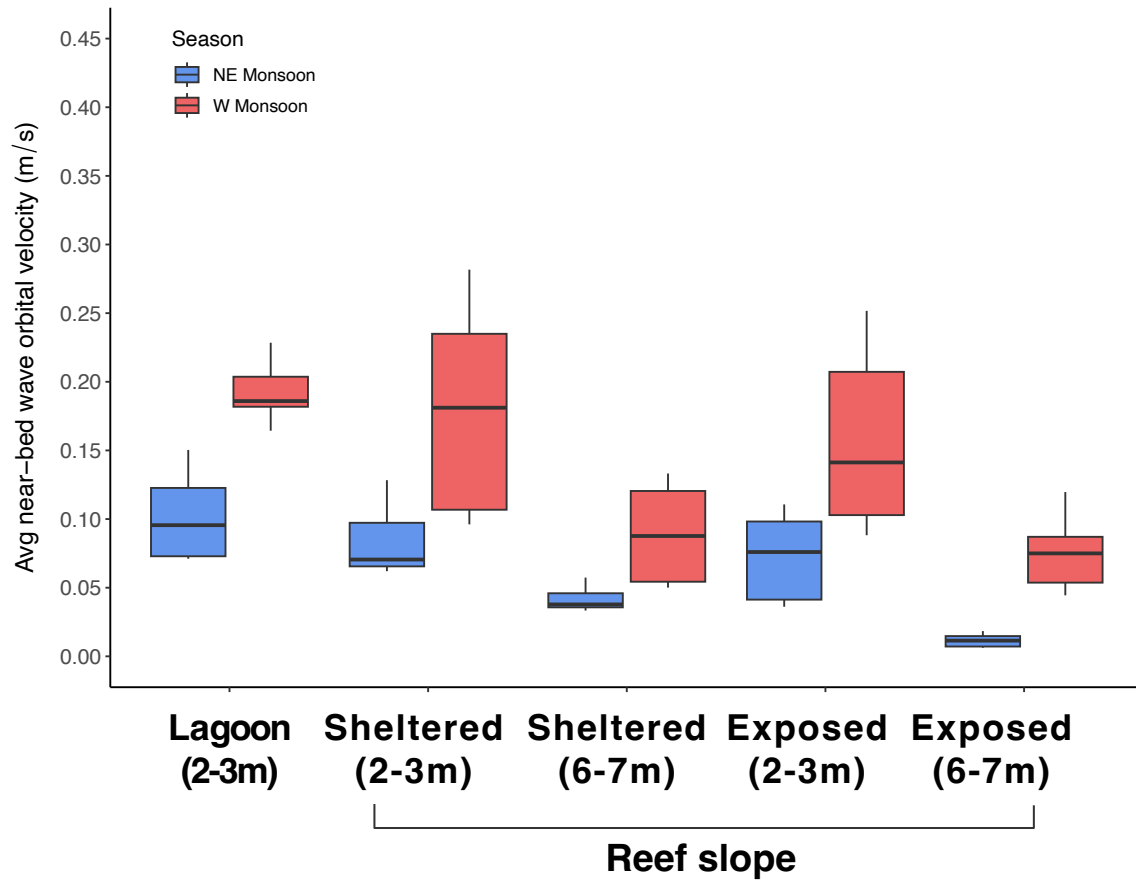

11

12 Figure S4 Boxplots representing the range of the nine (one per day for three days, across 3 sites) average peak velocity values (the average of all velocities across each day, as opposed  
 13 to the fastest velocity within each day period, shown in Figure 4 of the manuscript), estimated for each habitat in each monsoonal observation period.

14

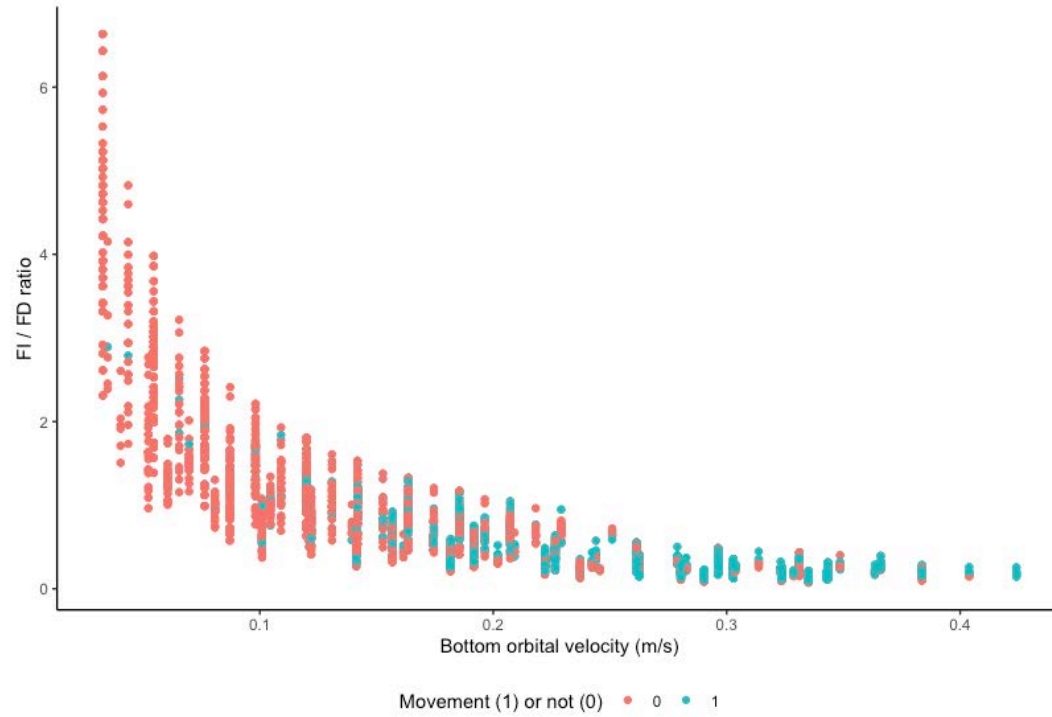

15

16 Figure S5: The relationship between bottom orbital velocity as estimated using the Soulsby Cosine Approximation and the ratio of the inertia force and drag force,  $FI/FD$ , for every  
 17 individual case in the wave flume (including free and interlocked rubble pieces across multiple trials and wave conditions). Note than even when  $FI=FD$ , the contribution to the  
 18 maximum total force from the inertia force is only  $0.25FD$ . Colours indicate whether the rubble piece moved (including rocking, transport or flipping) in each case.

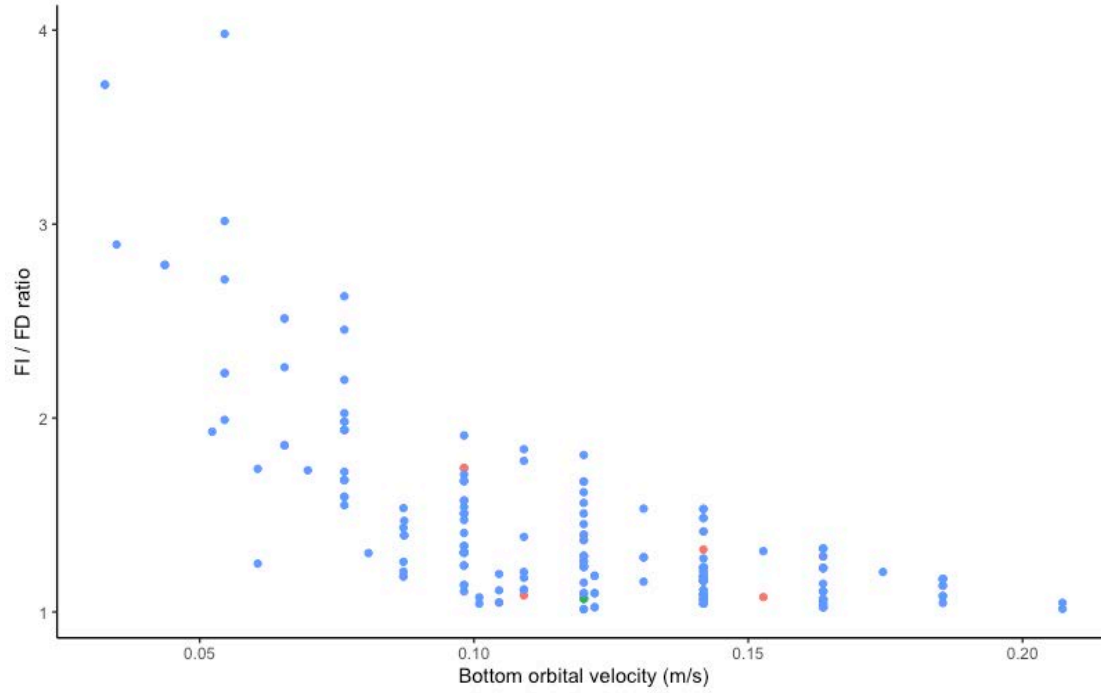

Movement type ● Flip ● Flip\_then\_Transport ● Rock

19

20 **Figure S6: The relationship between bottom orbital velocity and the FI/FD (inertia to drag force) ratio for cases where a) inertia was determined to have the potential to be significant**  
 21 **and b) rubble moved. Colours indicate the type of rubble movement (majority rocked only)**

22

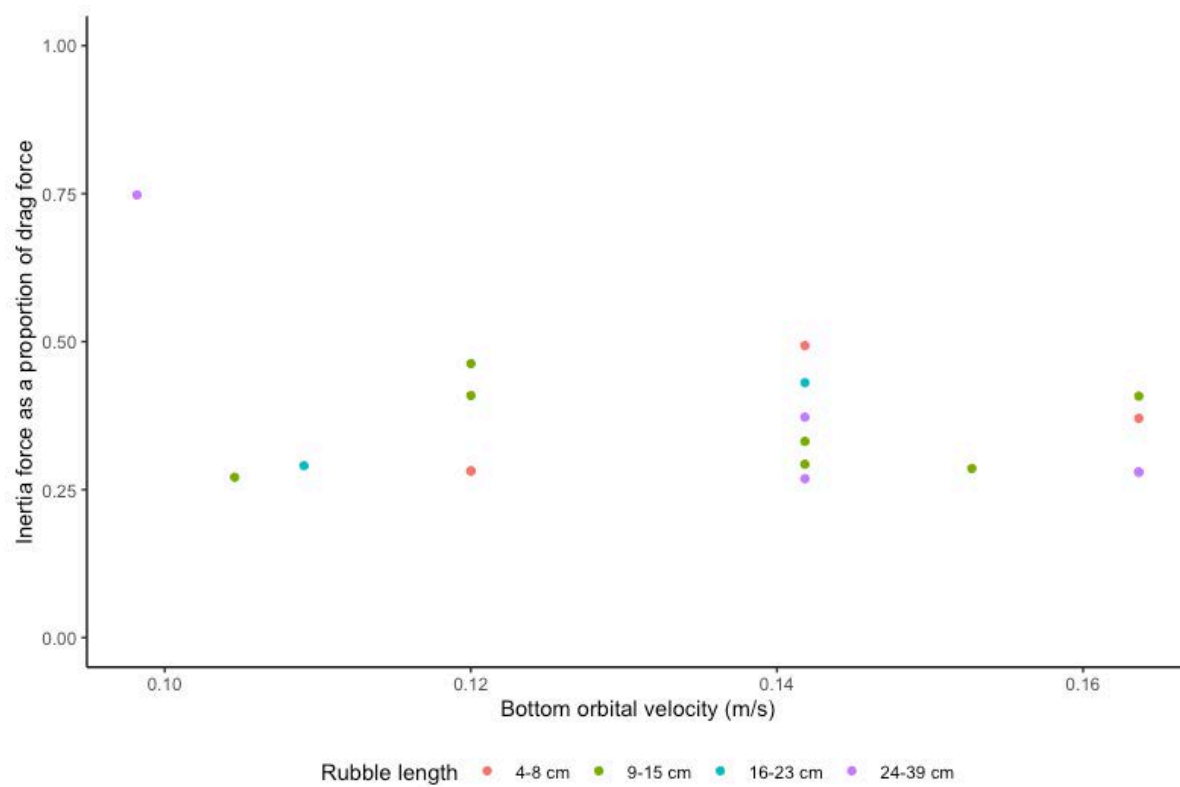

23

24 Figure S7 The relationship between bottom orbital velocity and the contribution of inertial force to the total force (i.e., the  $24/KC2$  value) for the 18 cases where there were  
25 flipping/transport movements recorded (not rocking) under conditions that had the potential to be inertia dominant. Colours indicate rubble length categories.



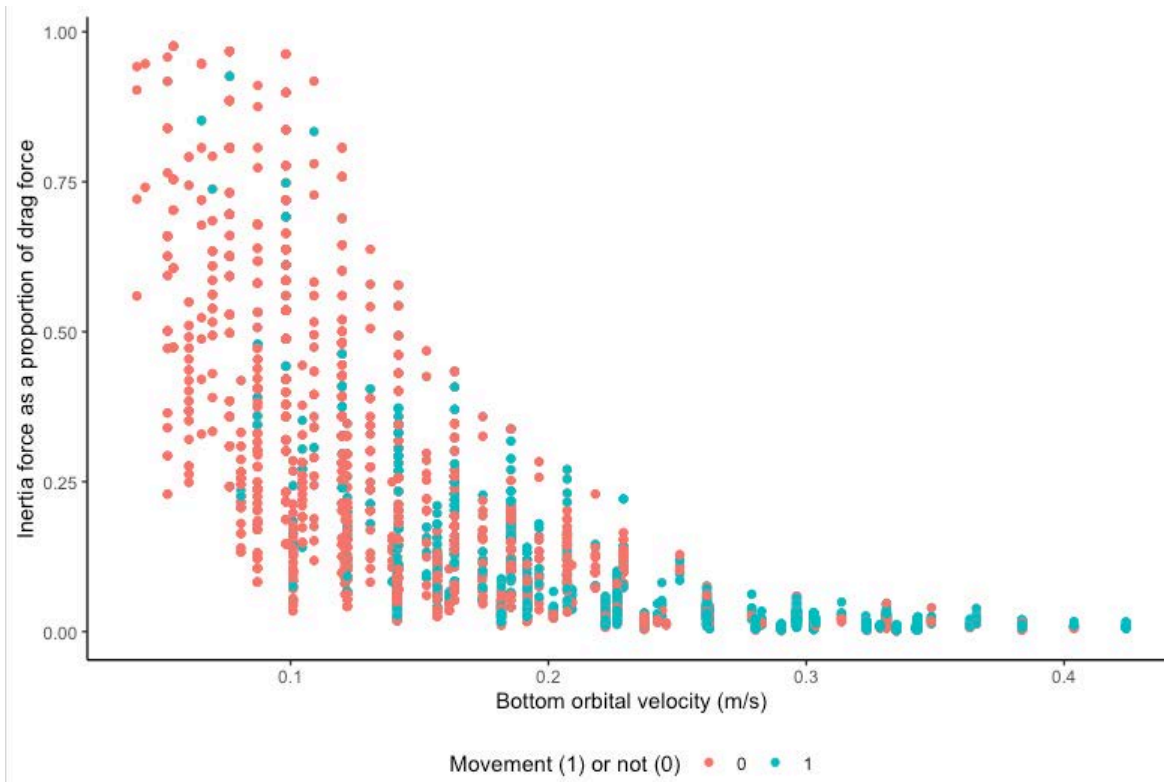

27 **Figure S8** The relationship between bottom orbital velocity and the contribution of inertial force to the total force (i.e., the  $24/KC^2$  value) for all cases where  $F_I/F_D < 2$ . Colours  
 28 indicate whether rubble moved at all or not.

29

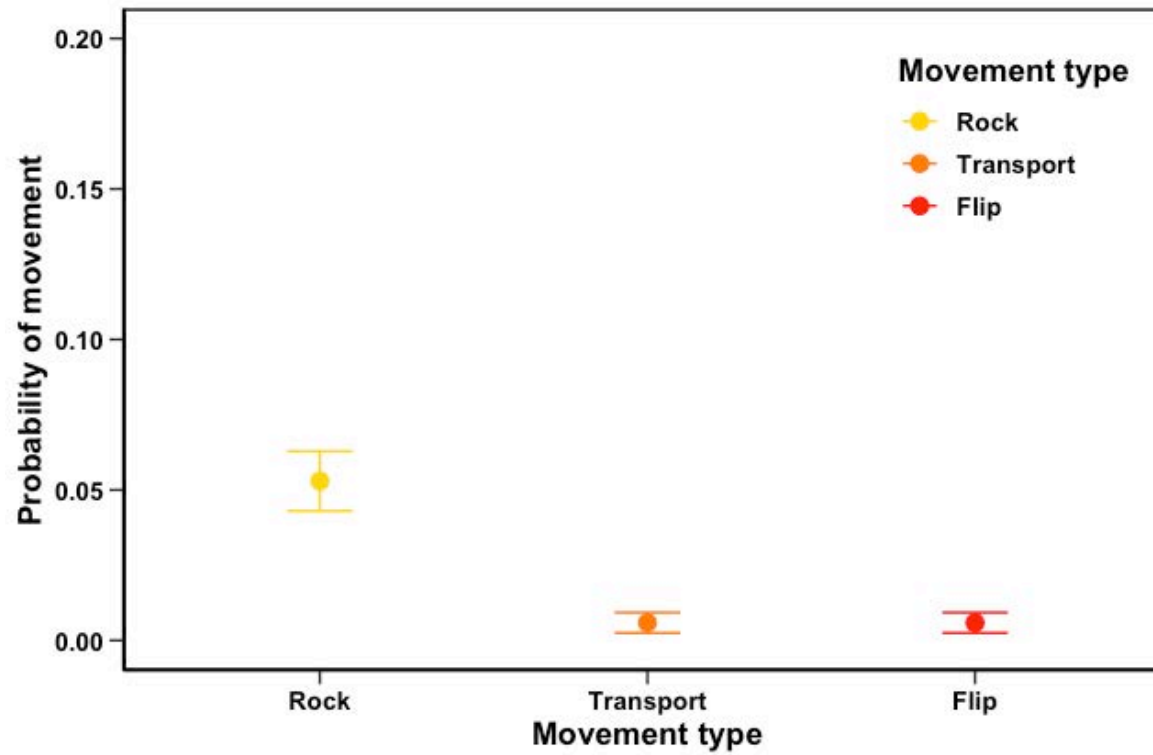

30

31 Figure S9 The probability of movement (mean  $\pm$  SE) for interlocked rubble (across lengths 4-15 cm) according to each movement type.

32

33

**Table S1/S2 pre-amble:** Assuming the drag and inertia coefficients have the same magnitude, the ratio of the maximum inertia force to the maximum drag force is given by Dean and Dalrymple (1991) as:

$$(1) \frac{F_I}{F_D} = \frac{\pi^2}{KC} = \alpha \quad \text{where } KC = \frac{uT}{\varnothing} ; KC = \text{Keulegan-Carpenter number, } u = \text{maximum orbital wave velocity, } T = \text{wave period } \varnothing = \text{rubble diameter}$$

Hence  $F_I = \alpha F_D$

The maximum total force is again given by Dean and Dalrymple (1991), noting that the drag and inertia forces are out of phase,

$$(2) F_T = F_D + \frac{F_I^2}{4F_D} \quad F_T = \text{maximum total force, } F_D = \text{drag force, } F_I = \text{inertia force}$$

which can be written as  $F_T = F_D + \frac{\alpha^2}{4} F_D$  or  $F_T = F_D + \frac{24}{KC^2} F_D$

The last term ( $\frac{24}{KC^2}$ ) gives the contribution of the inertia force to the total maximum force as a proportion of the drag force. We consider the inertia component to be potentially significant when it contributes more than 25% of the drag force to the total force. For example, when  $F_I = F_D$ , the contribution to the maximum total force from the inertia force is  $0.25F_D$ . It should be noted that this relationship is only valid for  $\frac{F_I}{F_D} < 2$ , and when  $\frac{F_I}{F_D} > 2$ , the maximum force is pure inertia (Dean and Dalrymple, 1991).

34

35 **Table S1: The average coral rubble diameter, wave height, period, water depth, and corresponding velocities (estimated using both the Soulsby cosine approximation and Linear**  
 36 **wave theory), inertial force component and bottom orbital excursions for all wave conditions used in determining the relationship between velocity and movement in the wave flume.**  
 37 **KC number calculated by ‘T (s)’ multiplied by ‘Velocity (m/s)’ divided by ‘Rubble diameter (m)’.  $F_I/F_D$  calculated by  $\pi^2$  divided by ‘KC’. The KC number provides an indication of**  
 38 **the bottom excursions while  $24/KC^2$  indicates the contribution of the inertia force to the total maximum force as a proportion of the drag force. Note orbital displacement (S) divided**  
 39 **by rubble diameter (D) gives  $KC/2\pi$ , i.e.,  $S/D = KC/(2\pi)$ .**

| Depth (m) | H (m) | T (s) | Velocity<br>(Soulsby Cosine<br>Approximation)<br>(m/s) | Velocity<br>(Linear<br>wave<br>theory)<br>(m/s) | Rubble<br>diameter (m) | KC    | $F_I/F_D$ | $24/KC^2$ | Potential for<br>inertia force<br>to be<br>significant? | Maximum<br>force from? |
|-----------|-------|-------|--------------------------------------------------------|-------------------------------------------------|------------------------|-------|-----------|-----------|---------------------------------------------------------|------------------------|
| 0.42      | 0.03  | 1     | 0.033                                                  | 0.032                                           | 0.0164                 | 1.996 | 4.946     | 6.026     | Yes                                                     | Inertia                |

| Depth (m) | H (m) | T (s) | Velocity<br>(Soulsby Cosine<br>Approximation)<br>(m/s) | Velocity<br>(Linear<br>wave<br>theory)<br>(m/s) | Rubble<br>diameter (m) | KC     | $F_I/F_D$ | $24/KC^2$ | Potential for<br>inertia force<br>to be<br>significant? | Maximum<br>force from? |
|-----------|-------|-------|--------------------------------------------------------|-------------------------------------------------|------------------------|--------|-----------|-----------|---------------------------------------------------------|------------------------|
| 0.42      | 0.02  | 1.5   | 0.035                                                  | 0.036                                           | 0.0164                 | 3.188  | 3.096     | 2.361     | Yes                                                     | Inertia                |
| 0.42      | 0.02  | 2     | 0.040                                                  | 0.041                                           | 0.0164                 | 4.925  | 2.004     | 0.989     | Yes                                                     | Inertia                |
| 0.42      | 0.04  | 1     | 0.044                                                  | 0.043                                           | 0.0164                 | 2.661  | 3.709     | 3.390     | Yes                                                     | Inertia                |
| 0.42      | 0.03  | 1.5   | 0.052                                                  | 0.054                                           | 0.0164                 | 4.782  | 2.064     | 1.050     | Yes                                                     | Inertia                |
| 0.42      | 0.05  | 1     | 0.055                                                  | 0.054                                           | 0.0164                 | 3.326  | 2.967     | 2.169     | Yes                                                     | Inertia                |
| 0.42      | 0.03  | 2     | 0.061                                                  | 0.062                                           | 0.0164                 | 7.387  | 1.336     | 0.440     | Yes                                                     | Drag                   |
| 0.42      | 0.06  | 1     | 0.065                                                  | 0.065                                           | 0.0164                 | 3.991  | 2.473     | 1.507     | Yes                                                     | Inertia                |
| 0.42      | 0.04  | 1.5   | 0.070                                                  | 0.072                                           | 0.0164                 | 6.376  | 1.548     | 0.590     | Yes                                                     | Drag                   |
| 0.42      | 0.07  | 1     | 0.076                                                  | 0.076                                           | 0.0164                 | 4.657  | 2.120     | 1.107     | Yes                                                     | Inertia                |
| 0.42      | 0.04  | 2     | 0.081                                                  | 0.083                                           | 0.0164                 | 9.850  | 1.002     | 0.247     | No                                                      | Drag                   |
| 0.42      | 0.05  | 1.5   | 0.087                                                  | 0.090                                           | 0.0164                 | 7.970  | 1.238     | 0.378     | Yes                                                     | Drag                   |
| 0.42      | 0.08  | 1     | 0.087                                                  | 0.087                                           | 0.0164                 | 5.322  | 1.855     | 0.847     | Yes                                                     | Drag                   |
| 0.42      | 0.09  | 1     | 0.098                                                  | 0.097                                           | 0.0164                 | 5.987  | 1.649     | 0.670     | Yes                                                     | Drag                   |
| 0.42      | 0.05  | 2     | 0.101                                                  | 0.104                                           | 0.0164                 | 12.312 | 0.802     | 0.158     | No                                                      | Drag                   |
| 0.42      | 0.06  | 1.5   | 0.105                                                  | 0.108                                           | 0.0164                 | 9.564  | 1.032     | 0.262     | Yes                                                     | Drag                   |
| 0.42      | 0.1   | 1     | 0.109                                                  | 0.108                                           | 0.0164                 | 6.652  | 1.484     | 0.542     | Yes                                                     | Drag                   |

| Depth (m) | H (m) | T (s) | Velocity<br>(Soulsby Cosine<br>Approximation)<br>(m/s) | Velocity<br>(Linear<br>wave<br>theory)<br>(m/s) | Rubble<br>diameter (m) | KC     | $F_I/F_D$ | $24/KC^2$ | Potential for<br>inertia force<br>to be<br>significant? | Maximum<br>force from? |
|-----------|-------|-------|--------------------------------------------------------|-------------------------------------------------|------------------------|--------|-----------|-----------|---------------------------------------------------------|------------------------|
| 0.42      | 0.11  | 1     | 0.120                                                  | 0.119                                           | 0.0164                 | 7.317  | 1.349     | 0.448     | Yes                                                     | Drag                   |
| 0.42      | 0.06  | 2     | 0.121                                                  | 0.124                                           | 0.0164                 | 14.775 | 0.668     | 0.110     | No                                                      | Drag                   |
| 0.42      | 0.07  | 1.5   | 0.122                                                  | 0.126                                           | 0.0164                 | 11.158 | 0.885     | 0.193     | No                                                      | Drag                   |
| 0.42      | 0.12  | 1     | 0.131                                                  | 0.130                                           | 0.0164                 | 7.983  | 1.236     | 0.377     | Yes                                                     | Drag                   |
| 0.42      | 0.08  | 1.5   | 0.139                                                  | 0.144                                           | 0.0164                 | 12.752 | 0.774     | 0.148     | No                                                      | Drag                   |
| 0.42      | 0.07  | 2     | 0.141                                                  | 0.145                                           | 0.0164                 | 17.237 | 0.573     | 0.081     | No                                                      | Drag                   |
| 0.42      | 0.13  | 1     | 0.142                                                  | 0.141                                           | 0.0164                 | 8.648  | 1.141     | 0.321     | Yes                                                     | Drag                   |
| 0.42      | 0.14  | 1     | 0.153                                                  | 0.151                                           | 0.0164                 | 9.313  | 1.060     | 0.277     | Yes                                                     | Drag                   |
| 0.42      | 0.09  | 1.5   | 0.157                                                  | 0.162                                           | 0.0164                 | 14.346 | 0.688     | 0.117     | No                                                      | Drag                   |
| 0.42      | 0.08  | 2     | 0.162                                                  | 0.166                                           | 0.0164                 | 19.700 | 0.501     | 0.062     | No                                                      | Drag                   |
| 0.42      | 0.15  | 1     | 0.164                                                  | 0.162                                           | 0.0164                 | 9.978  | 0.989     | 0.241     | No                                                      | Drag                   |
| 0.42      | 0.1   | 1.5   | 0.174                                                  | 0.180                                           | 0.0164                 | 15.940 | 0.619     | 0.094     | No                                                      | Drag                   |
| 0.42      | 0.16  | 1     | 0.175                                                  | 0.173                                           | 0.0164                 | 10.644 | 0.927     | 0.212     | No                                                      | Drag                   |
| 0.42      | 0.09  | 2     | 0.182                                                  | 0.187                                           | 0.0164                 | 22.162 | 0.445     | 0.049     | No                                                      | Drag                   |
| 0.42      | 0.17  | 1     | 0.185                                                  | 0.184                                           | 0.0164                 | 11.309 | 0.873     | 0.188     | No                                                      | Drag                   |
| 0.42      | 0.11  | 1.5   | 0.192                                                  | 0.198                                           | 0.0164                 | 17.534 | 0.563     | 0.078     | No                                                      | Drag                   |

| Depth (m) | H (m) | T (s) | Velocity<br>(Soulsby Cosine<br>Approximation)<br>(m/s) | Velocity<br>(Linear<br>wave<br>theory)<br>(m/s) | Rubble<br>diameter (m) | KC     | $F_I/F_D$ | $24/KC^2$ | Potential for<br>inertia force<br>to be<br>significant? | Maximum<br>force from? |
|-----------|-------|-------|--------------------------------------------------------|-------------------------------------------------|------------------------|--------|-----------|-----------|---------------------------------------------------------|------------------------|
| 0.42      | 0.18  | 1     | 0.196                                                  | 0.195                                           | 0.0164                 | 11.974 | 0.824     | 0.167     | No                                                      | Drag                   |
| 0.42      | 0.1   | 2     | 0.202                                                  | 0.207                                           | 0.0164                 | 24.625 | 0.401     | 0.040     | No                                                      | Drag                   |
| 0.42      | 0.19  | 1     | 0.207                                                  | 0.206                                           | 0.0164                 | 12.639 | 0.781     | 0.150     | No                                                      | Drag                   |
| 0.42      | 0.12  | 1.5   | 0.209                                                  | 0.216                                           | 0.0164                 | 19.128 | 0.516     | 0.066     | No                                                      | Drag                   |
| 0.42      | 0.2   | 1     | 0.218                                                  | 0.216                                           | 0.0164                 | 13.304 | 0.742     | 0.136     | No                                                      | Drag                   |
| 0.42      | 0.11  | 2     | 0.222                                                  | 0.228                                           | 0.0164                 | 27.087 | 0.364     | 0.033     | No                                                      | Drag                   |
| 0.42      | 0.13  | 1.5   | 0.227                                                  | 0.234                                           | 0.0164                 | 20.722 | 0.476     | 0.056     | No                                                      | Drag                   |
| 0.42      | 0.21  | 1     | 0.229                                                  | 0.227                                           | 0.0164                 | 13.970 | 0.707     | 0.123     | No                                                      | Drag                   |
| 0.42      | 0.11  | 2.5   | 0.237                                                  | 0.242                                           | 0.0164                 | 36.159 | 0.273     | 0.018     | No                                                      | Drag                   |
| 0.42      | 0.12  | 2     | 0.242                                                  | 0.249                                           | 0.0164                 | 29.550 | 0.334     | 0.027     | No                                                      | Drag                   |
| 0.42      | 0.14  | 1.5   | 0.244                                                  | 0.252                                           | 0.0164                 | 22.316 | 0.442     | 0.048     | No                                                      | Drag                   |
| 0.42      | 0.11  | 3     | 0.246                                                  | 0.249                                           | 0.0164                 | 44.941 | 0.220     | 0.012     | No                                                      | Drag                   |
| 0.42      | 0.23  | 1     | 0.251                                                  | 0.249                                           | 0.0164                 | 15.300 | 0.645     | 0.103     | No                                                      | Drag                   |
| 0.42      | 0.15  | 1.5   | 0.261                                                  | 0.270                                           | 0.0164                 | 23.910 | 0.413     | 0.042     | No                                                      | Drag                   |
| 0.42      | 0.13  | 2     | 0.263                                                  | 0.269                                           | 0.0164                 | 32.012 | 0.308     | 0.023     | No                                                      | Drag                   |
| 0.42      | 0.16  | 1.5   | 0.279                                                  | 0.288                                           | 0.0164                 | 25.504 | 0.387     | 0.037     | No                                                      | Drag                   |

| Depth (m) | H (m) | T (s) | Velocity<br>(Soulsby Cosine<br>Approximation)<br>(m/s) | Velocity<br>(Linear<br>wave<br>theory)<br>(m/s) | Rubble<br>diameter (m) | KC     | $F_I/F_D$ | $24/KC^2$ | Potential for<br>inertia force<br>to be<br>significant? | Maximum<br>force from? |
|-----------|-------|-------|--------------------------------------------------------|-------------------------------------------------|------------------------|--------|-----------|-----------|---------------------------------------------------------|------------------------|
| 0.42      | 0.13  | 2.5   | 0.280                                                  | 0.286                                           | 0.0164                 | 42.734 | 0.231     | 0.013     | No                                                      | Drag                   |
| 0.42      | 0.14  | 2     | 0.283                                                  | 0.290                                           | 0.0164                 | 34.475 | 0.286     | 0.020     | No                                                      | Drag                   |
| 0.42      | 0.13  | 3     | 0.290                                                  | 0.294                                           | 0.0164                 | 53.112 | 0.186     | 0.009     | No                                                      | Drag                   |
| 0.42      | 0.17  | 1.5   | 0.296                                                  | 0.306                                           | 0.0164                 | 27.098 | 0.364     | 0.033     | No                                                      | Drag                   |
| 0.42      | 0.15  | 2     | 0.303                                                  | 0.311                                           | 0.0164                 | 36.937 | 0.267     | 0.018     | No                                                      | Drag                   |
| 0.5       | 0.17  | 2     | 0.304                                                  | 0.313                                           | 0.0164                 | 37.034 | 0.267     | 0.017     | No                                                      | Drag                   |
| 0.42      | 0.18  | 1.5   | 0.314                                                  | 0.325                                           | 0.0164                 | 28.692 | 0.344     | 0.029     | No                                                      | Drag                   |
| 0.42      | 0.16  | 2     | 0.323                                                  | 0.332                                           | 0.0164                 | 39.400 | 0.250     | 0.015     | No                                                      | Drag                   |
| 0.42      | 0.15  | 2.5   | 0.323                                                  | 0.330                                           | 0.0164                 | 49.308 | 0.200     | 0.010     | No                                                      | Drag                   |
| 0.5       | 0.17  | 2.5   | 0.329                                                  | 0.336                                           | 0.0164                 | 50.098 | 0.197     | 0.010     | No                                                      | Drag                   |
| 0.42      | 0.19  | 1.5   | 0.331                                                  | 0.343                                           | 0.0164                 | 30.286 | 0.326     | 0.026     | No                                                      | Drag                   |
| 0.42      | 0.15  | 3     | 0.335                                                  | 0.340                                           | 0.0164                 | 61.283 | 0.161     | 0.006     | No                                                      | Drag                   |
| 0.5       | 0.17  | 3     | 0.343                                                  | 0.348                                           | 0.0164                 | 62.699 | 0.157     | 0.006     | No                                                      | Drag                   |
| 0.42      | 0.17  | 2     | 0.343                                                  | 0.352                                           | 0.0164                 | 41.862 | 0.236     | 0.014     | No                                                      | Drag                   |
| 0.42      | 0.2   | 1.5   | 0.349                                                  | 0.361                                           | 0.0164                 | 31.880 | 0.310     | 0.024     | No                                                      | Drag                   |
| 0.42      | 0.18  | 2     | 0.363                                                  | 0.373                                           | 0.0164                 | 44.325 | 0.223     | 0.012     | No                                                      | Drag                   |

| Depth (m) | H (m) | T (s) | Velocity<br>(Soulby Cosine<br>Approximation)<br>(m/s) | Velocity<br>(Linear<br>wave<br>theory)<br>(m/s) | Rubble<br>diameter (m) | KC     | $F_I/F_D$ | $24/KC^2$ | Potential for<br>inertia force<br>to be<br>significant? | Maximum<br>force from? |
|-----------|-------|-------|-------------------------------------------------------|-------------------------------------------------|------------------------|--------|-----------|-----------|---------------------------------------------------------|------------------------|
| 0.42      | 0.21  | 1.5   | 0.366                                                 | 0.379                                           | 0.0164                 | 33.474 | 0.295     | 0.021     | No                                                      | Drag                   |
| 0.42      | 0.17  | 2.5   | 0.367                                                 | 0.373                                           | 0.0164                 | 55.882 | 0.177     | 0.008     | No                                                      | Drag                   |
| 0.42      | 0.17  | 3     | 0.380                                                 | 0.385                                           | 0.0164                 | 69.454 | 0.142     | 0.005     | No                                                      | Drag                   |
| 0.42      | 0.19  | 2     | 0.384                                                 | 0.394                                           | 0.0164                 | 46.787 | 0.211     | 0.011     | No                                                      | Drag                   |
| 0.42      | 0.2   | 2     | 0.404                                                 | 0.414                                           | 0.0164                 | 49.250 | 0.200     | 0.010     | No                                                      | Drag                   |
| 0.42      | 0.21  | 2     | 0.424                                                 | 0.435                                           | 0.0164                 | 51.712 | 0.191     | 0.009     | No                                                      | Drag                   |

40

41



42 Table S2: The average coral rubble diameter, significant wave height ( $H_s$ ), peak wave period ( $T_P$ ), water depth, and corresponding velocities (estimated using both Soulsbys cosine  
 43 approximation and Linear wave theory), inertial force component (accelerations) and bottom orbital excursions for all wave conditions used in determining the relationship between  
 44 velocity and movement in the field. KC number calculated by 'Max  $T_P$  (s)' multiplied by 'Max peak u (m/s)' divided by 'Rubble diameter (m)'.  $F_I/F_D$  calculated by  $\pi^2$  divided by  
 45 'KC'. The KC number provides an indication of the bottom excursions while  $24/KC^2$  indicates the contribution of the inertia force to the total maximum force as a proportion of the  
 46 drag force. Note orbital displacement (S) divided by rubble diameter (D) gives  $KC/2\pi$ , i.e.,  $S/D = KC/(2\pi)$ .

| Mon-<br>soon<br>Seas-<br>on | Aspec<br>t | Site | Depth<br>categor<br>y | Day | Mean<br>Depth | Mean<br>$H_s$<br>(m) | Mean<br>$T_P$ (s) | Mean<br>peak<br>wave<br>length | Mean<br>peak<br>u<br>(m/s) | Max<br>$H_s$<br>(m) | Max<br>$T_P$ (s) | Max<br>peak<br>wave<br>length | Max<br>peak<br>u<br>(m/s) | Rubble<br>diamete<br>r (m) | KC<br>*     | $F_I/F_D$ | $24/K^2$ | Inerti<br>a<br>Signif<br>.? | Max.<br>force<br>from? |
|-----------------------------|------------|------|-----------------------|-----|---------------|----------------------|-------------------|--------------------------------|----------------------------|---------------------|------------------|-------------------------------|---------------------------|----------------------------|-------------|-----------|----------|-----------------------------|------------------------|
| NE                          | L          | 1    | 2-3m                  | 1   | 1.665         | 0.062                | 8.820             | 35.61<br>4                     | 0.073                      | 0.076               | 12.95<br>0       | 52.89<br>1                    | 0.088                     | 0.0169                     | 67.4<br>23  | 0.146     | 0.005    | No                          | Drag                   |
| NE                          | L          | 1    | 2-3m                  | 2   | 1.631         | 0.060                | 9.892             | 39.61<br>7                     | 0.071                      | 0.075               | 13.43<br>3       | 55.04<br>7                    | 0.086                     | 0.0169                     | 68.3<br>23  | 0.144     | 0.005    | No                          | Drag                   |
| NE                          | L          | 1    | 2-3m                  | 3   | 1.634         | 0.077                | 8.807             | 35.29<br>2                     | 0.091                      | 0.105               | 10.16<br>9       | 43.15<br>5                    | 0.118                     | 0.0169                     | 71.0<br>79  | 0.139     | 0.005    | No                          | Drag                   |
| NE                          | L          | 2    | 2-3m                  | 1   | 1.622         | 0.065                | 8.587             | 34.04<br>8                     | 0.077                      | 0.128               | 19.78<br>0       | 68.72<br>6                    | 0.180                     | 0.0169                     | 210.<br>180 | 0.047     | 0.001    | No                          | Drag                   |
| NE                          | L          | 2    | 2-3m                  | 2   | 1.597         | 0.059                | 8.739             | 34.58<br>0                     | 0.071                      | 0.074               | 12.08<br>1       | 49.88<br>4                    | 0.085                     | 0.0169                     | 60.5<br>15  | 0.163     | 0.007    | No                          | Drag                   |
| NE                          | L          | 2    | 2-3m                  | 3   | 1.600         | 0.080                | 8.804             | 34.88<br>3                     | 0.096                      | 0.116               | 10.58<br>8       | 40.73<br>9                    | 0.134                     | 0.0169                     | 83.7<br>26  | 0.118     | 0.003    | No                          | Drag                   |

| Monsoon Season | Aspect | Site | Depth category | Day | Mean Depth | Mean H <sub>s</sub> (m) | Mean T <sub>P</sub> (s) | Mean peak wave length | Mean peak u (m/s) | Max H <sub>s</sub> (m) | Max T <sub>P</sub> (s) | Max peak wave length | Max peak u (m/s) | Rubble diameter (m) | KC *    | F <sub>I</sub> /F <sub>D</sub> | 24/K <sup>2</sup> | Inertia Signif.? | Max. force from? |
|----------------|--------|------|----------------|-----|------------|-------------------------|-------------------------|-----------------------|-------------------|------------------------|------------------------|----------------------|------------------|---------------------|---------|--------------------------------|-------------------|------------------|------------------|
| NE             | L      | 3    | 2-3m           | 1   | 1.592      | 0.118                   | 5.479                   | 21.475                | 0.123             | 0.208                  | 17.308                 | 71.702               | 0.188            | 0.0169              | 192.242 | 0.051                          | 0.001             | No               | Drag             |
| NE             | L      | 3    | 2-3m           | 2   | 1.566      | 0.100                   | 15.223                  | 59.407                | 0.122             | 0.142                  | 16.981                 | 68.969               | 0.163            | 0.0169              | 163.769 | 0.060                          | 0.001             | No               | Drag             |
| NE             | L      | 3    | 2-3m           | 3   | 1.585      | 0.124                   | 13.790                  | 54.188                | 0.150             | 0.195                  | 15.254                 | 58.881               | 0.217            | 0.0169              | 195.622 | 0.050                          | 0.001             | No               | Drag             |
| NE             | SE     | 1    | 2-3m           | 1   | 3.579      | 0.092                   | 8.551                   | 50.579                | 0.071             | 0.135                  | 9.524                  | 54.084               | 0.103            | 0.0169              | 57.829  | 0.171                          | 0.007             | No               | Drag             |
| NE             | SE     | 1    | 2-3m           | 2   | 3.583      | 0.084                   | 10.327                  | 61.170                | 0.066             | 0.106                  | 14.634                 | 86.444               | 0.081            | 0.0169              | 70.355  | 0.140                          | 0.005             | No               | Drag             |
| NE             | SE     | 1    | 2-3m           | 3   | 3.573      | 0.078                   | 11.211                  | 66.247                | 0.062             | 0.112                  | 12.766                 | 75.711               | 0.090            | 0.0169              | 67.983  | 0.145                          | 0.005             | No               | Drag             |
| NE             | SE     | 1    | 6-7m           | 1   | 7.853      | 0.082                   | 8.509                   | 74.607                | 0.039             | 0.124                  | 9.524                  | 82.000               | 0.059            | 0.0169              | 32.980  | 0.299                          | 0.022             | No               | Drag             |
| NE             | SE     | 1    | 6-7m           | 2   | 7.857      | 0.073                   | 10.193                  | 89.437                | 0.036             | 0.094                  | 14.400                 | 126.175              | 0.044            | 0.0169              | 37.414  | 0.264                          | 0.017             | No               | Drag             |

| Monsoon Season | Aspect | Site | Depth category | Day | Mean Depth | Mean H <sub>s</sub> (m) | Mean T <sub>P</sub> (s) | Mean peak wave length | Mean peak u (m/s) | Max H <sub>s</sub> (m) | Max T <sub>P</sub> (s) | Max peak wave length | Max peak u (m/s) | Rubble diameter (m) | KC *    | F <sub>I</sub> /F <sub>D</sub> | 24/K <sup>2</sup> | Inertia Signif.? | Max. force from? |
|----------------|--------|------|----------------|-----|------------|-------------------------|-------------------------|-----------------------|-------------------|------------------------|------------------------|----------------------|------------------|---------------------|---------|--------------------------------|-------------------|------------------|------------------|
| NE             | SE     | 1    | 6-7m           | 3   | 7.847      | 0.069                   | 11.293                  | 98.998                | 0.035             | 0.098                  | 12.587                 | 111.215              | 0.051            | 0.0169              | 37.978  | 0.260                          | 0.017             | No               | Drag             |
| NE             | SE     | 2    | 2-3m           | 1   | 2.450      | 0.148                   | 6.799                   | 32.952                | 0.126             | 0.243                  | 9.424                  | 46.210               | 0.224            | 0.0169              | 124.689 | 0.079                          | 0.002             | No               | Drag             |
| NE             | SE     | 2    | 2-3m           | 2   | 2.476      | 0.135                   | 8.451                   | 41.610                | 0.128             | 0.184                  | 10.112                 | 53.242               | 0.171            | 0.0169              | 102.138 | 0.097                          | 0.002             | No               | Drag             |
| NE             | SE     | 2    | 2-3m           | 3   | 2.482      | 0.102                   | 9.159                   | 45.092                | 0.097             | 0.171                  | 9.890                  | 51.659               | 0.156            | 0.0169              | 91.273  | 0.108                          | 0.003             | No               | Drag             |
| NE             | SE     | 2    | 6-7m           | 1   | 7.013      | 0.129                   | 6.643                   | 54.882                | 0.050             | 0.198                  | 9.626                  | 77.488               | 0.086            | 0.0169              | 48.814  | 0.202                          | 0.010             | No               | Drag             |
| NE             | SE     | 2    | 6-7m           | 2   | 7.050      | 0.116                   | 8.275                   | 68.783                | 0.057             | 0.156                  | 10.169                 | 85.184               | 0.079            | 0.0169              | 47.590  | 0.207                          | 0.011             | No               | Drag             |
| NE             | SE     | 2    | 6-7m           | 3   | 7.056      | 0.088                   | 9.140                   | 75.980                | 0.046             | 0.154                  | 10.227                 | 88.103               | 0.080            | 0.0169              | 48.461  | 0.204                          | 0.010             | No               | Drag             |
| NE             | SE     | 3    | 2-3m           | 1   | 2.824      | 0.081                   | 9.700                   | 50.946                | 0.072             | 0.112                  | 10.169                 | 54.648               | 0.095            | 0.0169              | 57.010  | 0.173                          | 0.007             | No               | Drag             |

| Monsoon Season | Aspect | Site | Depth category | Day | Mean Depth | Mean H <sub>s</sub> (m) | Mean T <sub>P</sub> (s) | Mean peak wave length | Mean peak u (m/s) | Max H <sub>s</sub> (m) | Max T <sub>P</sub> (s) | Max peak wave length | Max peak u (m/s) | Rubble diameter (m) | KC *    | F <sub>I</sub> /F <sub>D</sub> | 24/K <sup>2</sup> | Inertia Signif.? | Max. force from? |
|----------------|--------|------|----------------|-----|------------|-------------------------|-------------------------|-----------------------|-------------------|------------------------|------------------------|----------------------|------------------|---------------------|---------|--------------------------------|-------------------|------------------|------------------|
| NE             | SE     | 3    | 2-3m           | 2   | 2.854      | 0.074                   | 9.740                   | 51.437                | 0.065             | 0.113                  | 11.043                 | 56.263               | 0.098            | 0.0169              | 63.857  | 0.155                          | 0.006             | No               | Drag             |
| NE             | SE     | 3    | 2-3m           | 3   | 2.837      | 0.078                   | 9.404                   | 49.573                | 0.069             | 0.109                  | 10.345                 | 54.573               | 0.097            | 0.0169              | 59.305  | 0.166                          | 0.007             | No               | Drag             |
| NE             | SE     | 3    | 6-7m           | 1   | 7.157      | 0.072                   | 9.718                   | 81.362                | 0.038             | 0.101                  | 10.286                 | 86.772               | 0.051            | 0.0169              | 31.005  | 0.318                          | 0.025             | No               | Drag             |
| NE             | SE     | 3    | 6-7m           | 2   | 7.188      | 0.065                   | 9.652                   | 80.975                | 0.033             | 0.102                  | 11.180                 | 92.480               | 0.052            | 0.0169              | 34.667  | 0.285                          | 0.020             | No               | Drag             |
| NE             | SE     | 3    | 6-7m           | 3   | 7.170      | 0.069                   | 9.411                   | 78.893                | 0.036             | 0.097                  | 10.345                 | 86.677               | 0.049            | 0.0169              | 30.044  | 0.329                          | 0.027             | No               | Drag             |
| NE             | W      | 1    | 2-3m           | 1   | 1.899      | 0.087                   | 4.111                   | 17.872                | 0.076             | 0.146                  | 8.531                  | 40.199               | 0.136            | 0.0169              | 68.887  | 0.143                          | 0.005             | No               | Drag             |
| NE             | W      | 1    | 2-3m           | 2   | 1.917      | 0.126                   | 4.052                   | 17.324                | 0.108             | 0.274                  | 8.182                  | 35.495               | 0.215            | 0.0169              | 104.292 | 0.095                          | 0.002             | No               | Drag             |
| NE             | W      | 1    | 2-3m           | 3   | 1.898      | 0.110                   | 3.561                   | 15.215                | 0.093             | 0.223                  | 7.930                  | 31.228               | 0.194            | 0.0169              | 90.852  | 0.109                          | 0.003             | No               | Drag             |

| Monsoon Season | Aspect | Site | Depth category | Day | Mean Depth | Mean H <sub>s</sub> (m) | Mean T <sub>P</sub> (s) | Mean peak wave length | Mean peak u (m/s) | Max H <sub>s</sub> (m) | Max T <sub>P</sub> (s) | Max peak wave length | Max peak u (m/s) | Rubble diameter (m) | KC *   | F <sub>I</sub> /F <sub>D</sub> | 24/K <sup>2</sup> | Inertia Signif.? | Max. force from? |
|----------------|--------|------|----------------|-----|------------|-------------------------|-------------------------|-----------------------|-------------------|------------------------|------------------------|----------------------|------------------|---------------------|--------|--------------------------------|-------------------|------------------|------------------|
| NE             | W      | 1    | 6-7m           | 1   | 7.774      | 0.068                   | 3.656                   | 31.897                | 0.011             | 0.116                  | 4.072                  | 35.785               | 0.016            | 0.0169              | 3.878  | 2.545                          | 1.596             | Yes              | Inertia          |
| NE             | W      | 1    | 6-7m           | 2   | 7.735      | 0.054                   | 4.434                   | 38.699                | 0.011             | 0.086                  | 8.491                  | 74.476               | 0.028            | 0.0169              | 13.872 | 0.711                          | 0.125             | No               | Drag             |
| NE             | W      | 1    | 6-7m           | 3   | 7.742      | 0.077                   | 4.706                   | 40.904                | 0.015             | 0.165                  | 8.654                  | 73.682               | 0.032            | 0.0169              | 16.568 | 0.596                          | 0.087             | No               | Drag             |
| NE             | W      | 2    | 2-3m           | 1   | 2.778      | 0.123                   | 3.179                   | 16.591                | 0.072             | 0.215                  | 3.888                  | 19.710               | 0.130            | 0.0169              | 29.947 | 0.330                          | 0.027             | No               | Drag             |
| NE             | W      | 2    | 2-3m           | 2   | 2.807      | 0.172                   | 3.537                   | 18.548                | 0.111             | 0.227                  | 3.830                  | 20.804               | 0.142            | 0.0169              | 32.288 | 0.306                          | 0.023             | No               | Drag             |
| NE             | W      | 2    | 2-3m           | 3   | 2.806      | 0.154                   | 3.491                   | 18.292                | 0.098             | 0.208                  | 3.711                  | 19.600               | 0.125            | 0.0169              | 27.542 | 0.358                          | 0.032             | No               | Drag             |
| NE             | W      | 2    | 6-7m           | 1   | 7.176      | 0.074                   | 3.736                   | 31.329                | 0.012             | 0.142                  | 7.860                  | 65.564               | 0.025            | 0.0169              | 11.712 | 0.843                          | 0.175             | No               | Drag             |
| NE             | W      | 2    | 6-7m           | 2   | 7.200      | 0.110                   | 3.524                   | 29.597                | 0.018             | 0.149                  | 3.982                  | 32.925               | 0.029            | 0.0169              | 6.947  | 1.421                          | 0.497             | Yes              | Drag             |

| Monsoon Season | Aspect | Site | Depth category | Day | Mean Depth | Mean H <sub>s</sub> (m) | Mean T <sub>P</sub> (s) | Mean peak wave length | Mean peak u (m/s) | Max H <sub>s</sub> (m) | Max T <sub>P</sub> (s) | Max peak wave length | Max peak u (m/s) | Rubble diameter (m) | KC *        | F <sub>I</sub> /F <sub>D</sub> | 24/K <sup>2</sup> | Inertia Signif.? | Max. force from? |
|----------------|--------|------|----------------|-----|------------|-------------------------|-------------------------|-----------------------|-------------------|------------------------|------------------------|----------------------|------------------|---------------------|-------------|--------------------------------|-------------------|------------------|------------------|
| NE             | W      | 2    | 6-7m           | 3   | 7.074      | 0.105                   | 3.490                   | 29.05<br>2            | 0.018             | 0.165                  | 3.696                  | 30.98<br>2           | 0.026            | 0.0169              | 5.65<br>4   | 1.746                          | 0.751             | Yes              | Drag             |
| NE             | W      | 3    | 2-3m           | 1   | 2.953      | 0.066                   | 5.332                   | 28.27<br>6            | 0.041             | 0.123                  | 12.00<br>0             | 62.96<br>9           | 0.061            | 0.0169              | 43.0<br>96  | 0.229                          | 0.013             | No               | Drag             |
| NE             | W      | 3    | 2-3m           | 2   | 2.994      | 0.062                   | 5.698                   | 30.62<br>7            | 0.039             | 0.114                  | 17.30<br>8             | 93.51<br>6           | 0.064            | 0.0169              | 65.1<br>49  | 0.151                          | 0.006             | No               | Drag             |
| NE             | W      | 3    | 2-3m           | 3   | 2.965      | 0.047                   | 7.621                   | 41.14<br>5            | 0.036             | 0.077                  | 11.61<br>3             | 66.60<br>7           | 0.050            | 0.0169              | 34.4<br>56  | 0.286                          | 0.020             | No               | Drag             |
| NE             | W      | 3    | 6-7m           | 1   | NA         | NA                      | NA                      | NA                    | 0.007             | NA                     | NA                     | NA                   | 0.011            | 0.0169              | NA          | NA                             | NA                | NA               | Drag             |
| NE             | W      | 3    | 6-7m           | 2   | NA         | NA                      | NA                      | NA                    | 0.007             | NA                     | NA                     | NA                   | 0.011            | 0.0169              | NA          | NA                             | NA                | NA               | Drag             |
| NE             | W      | 3    | 6-7m           | 3   | NA         | NA                      | NA                      | NA                    | 0.006             | NA                     | NA                     | NA                   | 0.009            | 0.0169              | NA          | NA                             | NA                | NA               | Drag             |
| W              | L      | 1    | 2-3m           | 1   | 1.315      | 0.139                   | 9.588                   | 34.37<br>3            | 0.185             | 0.191                  | 10.71<br>4             | 42.32<br>8           | 0.233            | 0.0169              | 147.<br>426 | 0.067                          | 0.001             | No               | Drag             |
| W              | L      | 1    | 2-3m           | 2   | 1.378      | 0.140                   | 9.335                   | 34.18<br>3            | 0.182             | 0.195                  | 10.65<br>1             | 43.26<br>2           | 0.227            | 0.0169              | 143.<br>078 | 0.069                          | 0.001             | No               | Drag             |

| Monsoon Season | Aspect | Site | Depth category | Day | Mean Depth | Mean H <sub>s</sub> (m) | Mean T <sub>P</sub> (s) | Mean peak wave length | Mean peak u (m/s) | Max H <sub>s</sub> (m) | Max T <sub>P</sub> (s) | Max peak wave length | Max peak u (m/s) | Rubble diameter (m) | KC *    | F <sub>I</sub> /F <sub>D</sub> | 24/K <sup>2</sup> | Inertia Signif.? | Max. force from? |
|----------------|--------|------|----------------|-----|------------|-------------------------|-------------------------|-----------------------|-------------------|------------------------|------------------------|----------------------|------------------|---------------------|---------|--------------------------------|-------------------|------------------|------------------|
| W              | L      | 1    | 2-3m           | 3   | 1.401      | 0.128                   | 8.934                   | 33.040                | 0.164             | 0.172                  | 10.000                 | 39.024               | 0.211            | 0.0169              | 124.969 | 0.079                          | 0.002             | No               | Drag             |
| W              | L      | 2    | 2-3m           | 1   | 1.391      | 0.157                   | 9.680                   | 35.655                | 0.204             | 0.210                  | 10.909                 | 44.685               | 0.246            | 0.0169              | 158.973 | 0.062                          | 0.001             | No               | Drag             |
| W              | L      | 2    | 2-3m           | 2   | 1.447      | 0.156                   | 9.304                   | 34.930                | 0.198             | 0.207                  | 10.112                 | 42.220               | 0.242            | 0.0169              | 144.934 | 0.068                          | 0.001             | No               | Drag             |
| W              | L      | 2    | 2-3m           | 3   | 1.468      | 0.139                   | 8.970                   | 33.941                | 0.175             | 0.182                  | 9.730                  | 39.224               | 0.218            | 0.0169              | 125.651 | 0.079                          | 0.002             | No               | Drag             |
| W              | L      | 3    | 2-3m           | 1   | 1.373      | 0.176                   | 8.653                   | 31.676                | 0.228             | 0.230                  | 9.730                  | 37.456               | 0.293            | 0.0169              | 168.641 | 0.059                          | 0.001             | No               | Drag             |
| W              | L      | 3    | 2-3m           | 2   | 1.374      | 0.161                   | 8.341                   | 30.521                | 0.209             | 0.206                  | 8.867                  | 33.752               | 0.253            | 0.0169              | 132.951 | 0.074                          | 0.001             | No               | Drag             |
| W              | L      | 3    | 2-3m           | 3   | 1.388      | 0.144                   | 8.248                   | 30.377                | 0.186             | 0.191                  | 8.955                  | 34.905               | 0.242            | 0.0169              | 128.460 | 0.077                          | 0.001             | No               | Drag             |
| W              | SE     | 1    | 2-3m           | 1   | 3.036      | 0.110                   | 12.924                  | 70.535                | 0.096             | 0.133                  | 19.780                 | 109.675              | 0.110            | 0.0169              | 129.061 | 0.076                          | 0.001             | No               | Drag             |

| Monsoon Season | Aspect | Site | Depth category | Day | Mean Depth | Mean H <sub>s</sub> (m) | Mean T <sub>p</sub> (s) | Mean peak wave length | Mean peak u (m/s) | Max H <sub>s</sub> (m) | Max T <sub>p</sub> (s) | Max peak wave length | Max peak u (m/s) | Rubble diameter (m) | KC *    | F <sub>I</sub> /F <sub>D</sub> | 24/K <sup>2</sup> | Inertia Signif.? | Max. force from? |
|----------------|--------|------|----------------|-----|------------|-------------------------|-------------------------|-----------------------|-------------------|------------------------|------------------------|----------------------|------------------|---------------------|---------|--------------------------------|-------------------|------------------|------------------|
| W              | SE     | 1    | 2-3m           | 2   | 3.055      | 0.125                   | 9.606                   | 52.575                | 0.107             | 0.141                  | 12.500                 | 67.796               | 0.123            | 0.0169              | 91.34   | 0.108                          | 0.003             | No               | Drag             |
| W              | SE     | 1    | 2-3m           | 3   | 3.054      | 0.120                   | 9.306                   | 50.885                | 0.103             | 0.141                  | 12.245                 | 66.861               | 0.117            | 0.0169              | 84.941  | 0.116                          | 0.003             | No               | Drag             |
| W              | SE     | 1    | 6-7m           | 1   | 7.664      | 0.095                   | 13.844                  | 120.104               | 0.050             | 0.116                  | 19.565                 | 172.839              | 0.058            | 0.0169              | 67.507  | 0.146                          | 0.005             | No               | Drag             |
| W              | SE     | 1    | 6-7m           | 2   | 7.685      | 0.108                   | 9.721                   | 84.376                | 0.054             | 0.121                  | 12.587                 | 108.860              | 0.060            | 0.0169              | 45.025  | 0.219                          | 0.012             | No               | Drag             |
| W              | SE     | 1    | 6-7m           | 3   | 7.684      | 0.105                   | 9.184                   | 79.701                | 0.052             | 0.124                  | 12.329                 | 106.465              | 0.060            | 0.0169              | 44.087  | 0.224                          | 0.012             | No               | Drag             |
| W              | SE     | 2    | 2-3m           | 1   | 2.188      | 0.271                   | 11.437                  | 52.925                | 0.282             | 0.361                  | 12.245                 | 57.936               | 0.398            | 0.0169              | 288.198 | 0.034                          | 0.000             | No               | Drag             |
| W              | SE     | 2    | 2-3m           | 2   | 2.158      | 0.251                   | 11.134                  | 51.172                | 0.263             | 0.294                  | 11.842                 | 56.007               | 0.330            | 0.0169              | 231.195 | 0.043                          | 0.000             | No               | Drag             |
| W              | SE     | 2    | 2-3m           | 3   | 2.292      | 0.226                   | 10.858                  | 51.457                | 0.228             | 0.295                  | 11.392                 | 54.940               | 0.311            | 0.0169              | 209.406 | 0.047                          | 0.001             | No               | Drag             |



| Monsoon Season | Aspect | Site | Depth category | Day | Mean Depth | Mean H <sub>s</sub> (m) | Mean T <sub>P</sub> (s) | Mean peak wave length | Mean peak u (m/s) | Max H <sub>s</sub> (m) | Max T <sub>P</sub> (s) | Max peak wave length | Max peak u (m/s) | Rubble diameter (m) | KC *    | F <sub>I</sub> /F <sub>D</sub> | 24/K <sup>2</sup> | Inertia Signif.? | Max. force from? |
|----------------|--------|------|----------------|-----|------------|-------------------------|-------------------------|-----------------------|-------------------|------------------------|------------------------|----------------------|------------------|---------------------|---------|--------------------------------|-------------------|------------------|------------------|
| W              | SE     | 2    | 6-7m           | 1   | 6.882      | 0.240                   | 11.502                  | 94.459                | 0.133             | 0.327                  | 12.414                 | 100.815              | 0.185            | 0.0169              | 136.178 | 0.072                          | 0.001             | No               | Drag             |
| W              | SE     | 2    | 6-7m           | 2   | 6.560      | 0.225                   | 11.140                  | 89.320                | 0.128             | 0.271                  | 12.000                 | 100.132              | 0.155            | 0.0169              | 110.097 | 0.090                          | 0.002             | No               | Drag             |
| W              | SE     | 2    | 6-7m           | 3   | 6.590      | 0.214                   | 10.675                  | 85.791                | 0.120             | 0.273                  | 11.392                 | 93.052               | 0.156            | 0.0169              | 105.302 | 0.094                          | 0.002             | No               | Drag             |
| W              | SE     | 3    | 2-3m           | 1   | NA         | NA                      | NA                      | NA                    | 0.181             | NA                     | NA                     | NA                   | 0.260            | 0.0169              | NA      | NA                             | NA                | NA               | Drag             |
| W              | SE     | 3    | 2-3m           | 2   | NA         | NA                      | NA                      | NA                    | 0.174             | NA                     | NA                     | NA                   | 0.266            | 0.0169              | NA      | NA                             | NA                | NA               | Drag             |
| W              | SE     | 3    | 2-3m           | 3   | NA         | NA                      | NA                      | NA                    | 0.235             | NA                     | NA                     | NA                   | 0.299            | 0.0169              | NA      | NA                             | NA                | NA               | Drag             |
| W              | SE     | 3    | 6-7m           | 1   | 7.762      | 0.175                   | 9.976                   | 87.021                | 0.088             | 0.257                  | 12.857                 | 109.219              | 0.126            | 0.0169              | 95.799  | 0.103                          | 0.003             | No               | Drag             |
| W              | SE     | 3    | 6-7m           | 2   | 7.792      | 0.169                   | 9.879                   | 86.318                | 0.084             | 0.261                  | 11.321                 | 101.470              | 0.129            | 0.0169              | 86.220  | 0.114                          | 0.003             | No               | Drag             |
| W              | SE     | 3    | 6-7m           | 3   | 7.801      | 0.227                   | 10.121                  | 88.478                | 0.114             | 0.289                  | 10.909                 | 95.312               | 0.145            | 0.0169              | 93.324  | 0.106                          | 0.003             | No               | Drag             |

| Monsoon Season | Aspect | Site | Depth category | Day | Mean Depth | Mean H <sub>s</sub> (m) | Mean T <sub>P</sub> (s) | Mean peak wave length | Mean peak u (m/s) | Max H <sub>s</sub> (m) | Max T <sub>P</sub> (s) | Max peak wave length | Max peak u (m/s) | Rubble diameter (m) | KC *    | F <sub>I</sub> /F <sub>D</sub> | 24/K <sup>2</sup> | Inertia Signif.? | Max. force from? |
|----------------|--------|------|----------------|-----|------------|-------------------------|-------------------------|-----------------------|-------------------|------------------------|------------------------|----------------------|------------------|---------------------|---------|--------------------------------|-------------------|------------------|------------------|
| W              | W      | 1    | 2-3m           | 1   | 2.908      | 0.118                   | 9.518                   | 50.807                | 0.103             | 0.157                  | 10.651                 | 59.955               | 0.129            | 0.0169              | 81.547  | 0.121                          | 0.004             | No               | Drag             |
| W              | W      | 1    | 2-3m           | 2   | 2.922      | 0.101                   | 9.055                   | 48.430                | 0.088             | 0.139                  | 10.465                 | 57.561               | 0.114            | 0.0169              | 70.433  | 0.140                          | 0.005             | No               | Drag             |
| W              | W      | 1    | 2-3m           | 3   | 2.920      | 0.103                   | 8.780                   | 46.912                | 0.089             | 0.158                  | 10.345                 | 58.696               | 0.133            | 0.0169              | 81.487  | 0.121                          | 0.004             | No               | Drag             |
| W              | W      | 1    | 6-7m           | 1   | 7.390      | 0.105                   | 9.496                   | 80.811                | 0.054             | 0.142                  | 10.651                 | 90.062               | 0.069            | 0.0169              | 43.523  | 0.227                          | 0.013             | No               | Drag             |
| W              | W      | 1    | 6-7m           | 2   | 7.405      | 0.088                   | 9.110                   | 77.610                | 0.044             | 0.121                  | 10.000                 | 85.242               | 0.060            | 0.0169              | 35.659  | 0.277                          | 0.019             | No               | Drag             |
| W              | W      | 1    | 6-7m           | 3   | 7.403      | 0.089                   | 8.868                   | 75.515                | 0.044             | 0.138                  | 9.890                  | 83.956               | 0.070            | 0.0169              | 40.680  | 0.243                          | 0.015             | No               | Drag             |
| W              | W      | 2    | 2-3m           | 1   | 2.500      | 0.133                   | 9.487                   | 46.959                | 0.127             | 0.179                  | 10.778                 | 55.151               | 0.170            | 0.0169              | 108.109 | 0.091                          | 0.002             | No               | Drag             |
| W              | W      | 2    | 2-3m           | 2   | 2.501      | 0.148                   | 9.717                   | 48.077                | 0.141             | 0.192                  | 10.651                 | 52.914               | 0.184            | 0.0169              | 115.996 | 0.085                          | 0.002             | No               | Drag             |

| Monsoon Season | Aspect | Site | Depth category | Day | Mean Depth | Mean H <sub>s</sub> (m) | Mean T <sub>P</sub> (s) | Mean peak wave length | Mean peak u (m/s) | Max H <sub>s</sub> (m) | Max T <sub>P</sub> (s) | Max peak wave length | Max peak u (m/s) | Rubble diameter (m) | KC *    | F <sub>I</sub> /F <sub>D</sub> | 24/K <sup>2</sup> | Inertia Signif.? | Max. force from? |
|----------------|--------|------|----------------|-----|------------|-------------------------|-------------------------|-----------------------|-------------------|------------------------|------------------------|----------------------|------------------|---------------------|---------|--------------------------------|-------------------|------------------|------------------|
| W              | W      | 2    | 2-3m           | 3   | 2.515      | 0.158                   | 9.407                   | 46.714                | 0.149             | 0.234                  | 10.526                 | 54.952               | 0.212            | 0.0169              | 132.212 | 0.075                          | 0.001             | No               | Drag             |
| W              | W      | 2    | 6-7m           | 1   | 6.469      | 0.122                   | 9.593                   | 76.394                | 0.068             | 0.166                  | 10.778                 | 86.945               | 0.091            | 0.0169              | 58.137  | 0.170                          | 0.007             | No               | Drag             |
| W              | W      | 2    | 6-7m           | 2   | 6.470      | 0.134                   | 9.848                   | 78.409                | 0.075             | 0.172                  | 11.180                 | 89.536               | 0.098            | 0.0169              | 65.074  | 0.152                          | 0.006             | No               | Drag             |
| W              | W      | 2    | 6-7m           | 3   | 6.484      | 0.141                   | 9.367                   | 74.690                | 0.078             | 0.210                  | 10.526                 | 83.834               | 0.114            | 0.0169              | 71.066  | 0.139                          | 0.005             | No               | Drag             |
| W              | W      | 3    | 2-3m           | 1   | 3.011      | 0.285                   | 7.536                   | 41.083                | 0.207             | 0.741                  | 10.976                 | 60.068               | 0.429            | 0.0169              | 278.803 | 0.035                          | 0.000             | No               | Drag             |
| W              | W      | 3    | 2-3m           | 2   | 2.959      | 0.307                   | 8.220                   | 44.189                | 0.252             | 0.544                  | 9.626                  | 53.258               | 0.345            | 0.0169              | 196.585 | 0.050                          | 0.001             | No               | Drag             |
| W              | W      | 3    | 2-3m           | 3   | 2.981      | 0.256                   | 8.331                   | 45.006                | 0.213             | 0.373                  | 9.836                  | 54.284               | 0.289            | 0.0169              | 168.299 | 0.059                          | 0.001             | No               | Drag             |
| W              | W      | 3    | 6-7m           | 1   | 7.773      | 0.247                   | 7.846                   | 68.549                | 0.087             | 0.724                  | 11.613                 | 101.601              | 0.155            | 0.0169              | 106.377 | 0.093                          | 0.002             | No               | Drag             |

| Monsoon Season | Aspect | Site | Depth category | Day | Mean Depth | Mean H <sub>s</sub> (m) | Mean T <sub>p</sub> (s) | Mean peak wave length | Mean peak u (m/s) | Max H <sub>s</sub> (m) | Max T <sub>p</sub> (s) | Max peak wave length | Max peak u (m/s) | Rubble diameter (m) | KC*    | F <sub>I</sub> /F <sub>D</sub> | 24/K <sup>2</sup> | Inertia Signif.? | Max. force from? |
|----------------|--------|------|----------------|-----|------------|-------------------------|-------------------------|-----------------------|-------------------|------------------------|------------------------|----------------------|------------------|---------------------|--------|--------------------------------|-------------------|------------------|------------------|
| W              | W      | 3    | 6-7m           | 2   | 7.722      | 0.270                   | 8.224                   | 71.496                | 0.120             | 0.456                  | 9.626                  | 84.625               | 0.168            | 0.0169              | 95.804 | 0.103                          | 0.003             | No               | Drag             |
| W              | W      | 3    | 6-7m           | 3   | 7.744      | 0.222                   | 7.625                   | 66.437                | 0.088             | 0.306                  | 9.783                  | 85.913               | 0.127            | 0.0169              | 73.558 | 0.134                          | 0.004             | No               | Drag             |

47

48

49 **Table S3 The 10%, 50% and 90% thresholds for transport, averaged across sizes 4-23 cm and both morphologies and substrates, for model “fl.t.threshold”.**

| Probability | Velocity (m/s) | SE    | lower | upper |
|-------------|----------------|-------|-------|-------|
| 0.1         | 0.172          | 0.004 | 0.165 | 0.179 |
| 0.5         | 0.303          | 0.003 | 0.298 | 0.309 |
| 0.9         | 0.435          | 0.006 | 0.423 | 0.446 |

50

51 **Table S4 The 10%, 50% and 90% thresholds for flipping, averaged across sizes 4-23 cm and both morphologies and substrates, for model “fl.f.thresholdNOXL”.**

| Probability | Velocity (m/s) | SE    | lower | upper |
|-------------|----------------|-------|-------|-------|
| 0.1         | 0.181          | 0.004 | 0.173 | 0.189 |
| 0.5         | 0.336          | 0.004 | 0.329 | 0.344 |
| 0.9         | 0.491          | 0.009 | 0.474 | 0.508 |

52 **Table S5 Anova table of model “fl.r.global” describing the effect of velocity, rubble size, branchiness and underlying substrate on the probability of rocking motions of rubble pieces.**

| Model term                              | LR $\chi^2$ | df | p-value ( $>\chi^2$ ) |
|-----------------------------------------|-------------|----|-----------------------|
| calculated.velocity_corrected           | 1012.400    | 1  | <0.001                |
| size                                    | 8.692       | 3  | 0.034                 |
| substrate                               | 0.732       | 1  | 0.392                 |
| branched                                | 191.305     | 1  | <0.001                |
| calculated.velocity_corrected:size      | 92.921      | 3  | <0.001                |
| calculated.velocity_corrected:substrate | 33.668      | 1  | <0.001                |

| Model term                                   | LR $\chi^2$ | df | p-value ( $>\chi^2$ ) |
|----------------------------------------------|-------------|----|-----------------------|
| calculated.velocity_corrected:branched       | 0.684       | 1  | 0.408                 |
| size:substrate                               | 20.401      | 3  | <0.001                |
| size:branched                                | 90.655      | 3  | <0.001                |
| substrate:branched                           | 33.544      | 1  | <0.001                |
| calculated.velocity_corrected:size:branched  | 55.330      | 3  | <0.001                |
| calculated.velocity_corrected:size:substrate | 17.765      | 3  | <0.001                |

53 Table S6 Pairwise comparisons between branched and unbranched rubble for 4 rubble size categories and 4 levels of continuous variable ‘velocity’ (0.01 m/s, 0.2 m/s (mean), 0.3 m/s,  
54 0.4 m/s) for model “fl.r.global”.

| Contrast              | Rubble size | Near-bed wave orbital<br>velocity (m/s) | Odds Ratio | SE    | df  | z-ratio | p-value |
|-----------------------|-------------|-----------------------------------------|------------|-------|-----|---------|---------|
| Unbranched / Branched | 4-8 cm      | 0.1                                     | 6.916      | 1.668 | Inf | 8.019   | <0.001  |
| Unbranched / Branched | 9-15 cm     | 0.1                                     | 1.795      | 0.435 | Inf | 2.414   | 0.016   |
| Unbranched / Branched | 16-23 cm    | 0.1                                     | 3.134      | 0.778 | Inf | 4.605   | <0.001  |
| Unbranched / Branched | 24-39 cm    | 0.1                                     | 4.378      | 0.989 | Inf | 6.534   | <0.001  |
| Unbranched / Branched | 4-8 cm      | 0.2                                     | 6.875      | 1.254 | Inf | 10.568  | <0.001  |
| Unbranched / Branched | 9-15 cm     | 0.2                                     | 4.462      | 0.977 | Inf | 6.829   | <0.001  |
| Unbranched / Branched | 16-23 cm    | 0.2                                     | 1.236      | 0.202 | Inf | 1.292   | 0.196   |
| Unbranched / Branched | 24-39 cm    | 0.2                                     | 9.042      | 1.708 | Inf | 11.659  | <0.001  |
| Unbranched / Branched | 4-8 cm      | 0.3                                     | 6.834      | 2.396 | Inf | 5.483   | <0.001  |

| <b>Contrast</b>       | <b>Rubble size</b> | <b>Near-bed wave orbital<br/>velocity (m/s)</b> | <b>Odds Ratio</b> | <b>SE</b> | <b>df</b> | <b>z-ratio</b> | <b>p-value</b> |
|-----------------------|--------------------|-------------------------------------------------|-------------------|-----------|-----------|----------------|----------------|
| Unbranched / Branched | 9-15 cm            | 0.3                                             | 11.093            | 4.560     | Inf       | 5.855          | <0.001         |
| Unbranched / Branched | 16-23 cm           | 0.3                                             | 0.487             | 0.115     | Inf       | -3.058         | 0.002          |
| Unbranched / Branched | 24-39 cm           | 0.3                                             | 18.676            | 6.167     | Inf       | 8.864          | <0.001         |
| Unbranched / Branched | 4-8 cm             | 0.4                                             | 6.794             | 3.885     | Inf       | 3.351          | 0.001          |
| Unbranched / Branched | 9-15 cm            | 0.4                                             | 27.577            | 17.907    | Inf       | 5.108          | <0.001         |
| Unbranched / Branched | 16-23 cm           | 0.4                                             | 0.192             | 0.074     | Inf       | -4.303         | <0.001         |
| Unbranched / Branched | 24-39 cm           | 0.4                                             | 38.572            | 20.088    | Inf       | 7.014          | <0.001         |
| Unbranched / Branched | 4-8 cm             | 0.1                                             | 6.916             | 1.668     | Inf       | 8.019          | <0.001         |
| Unbranched / Branched | 9-15 cm            | 0.1                                             | 1.795             | 0.435     | Inf       | 2.414          | 0.016          |
| Unbranched / Branched | 16-23 cm           | 0.1                                             | 3.134             | 0.778     | Inf       | 4.605          | <0.001         |
| Unbranched / Branched | 24-39 cm           | 0.1                                             | 4.378             | 0.989     | Inf       | 6.534          | <0.001         |
| Unbranched / Branched | 4-8 cm             | 0.2                                             | 6.875             | 1.254     | Inf       | 10.568         | <0.001         |
| Unbranched / Branched | 9-15 cm            | 0.2                                             | 4.462             | 0.977     | Inf       | 6.829          | <0.001         |
| Unbranched / Branched | 16-23 cm           | 0.2                                             | 1.236             | 0.202     | Inf       | 1.292          | 0.196          |
| Unbranched / Branched | 24-39 cm           | 0.2                                             | 9.042             | 1.708     | Inf       | 11.659         | <0.001         |
| Unbranched / Branched | 4-8 cm             | 0.3                                             | 6.834             | 2.396     | Inf       | 5.483          | <0.001         |
| Unbranched / Branched | 9-15 cm            | 0.3                                             | 11.093            | 4.560     | Inf       | 5.855          | <0.001         |
| Unbranched / Branched | 16-23 cm           | 0.3                                             | 0.487             | 0.115     | Inf       | -3.058         | 0.002          |
| Unbranched / Branched | 24-39 cm           | 0.3                                             | 18.676            | 6.167     | Inf       | 8.864          | <0.001         |
| Unbranched / Branched | 4-8 cm             | 0.4                                             | 6.794             | 3.885     | Inf       | 3.351          | 0.001          |
| Unbranched / Branched | 9-15 cm            | 0.4                                             | 27.577            | 17.907    | Inf       | 5.108          | <0.001         |
| Unbranched / Branched | 16-23 cm           | 0.4                                             | 0.192             | 0.074     | Inf       | -4.303         | <0.001         |
| Unbranched / Branched | 24-39 cm           | 0.4                                             | 38.572            | 20.088    | Inf       | 7.014          | <0.001         |

55 Table S7 Pairwise comparisons between rubble and sand substrate for 4 rubble size categories and 4 levels of continuous variable ‘velocity’ (0.01 m/s, 0.2 m/s (mean), 0.3 m/s, 0.4 m/s)  
 56 for model “fl.r.global”.

| Contrast      | Rubble size | Near-bed wave orbital velocity (m/s) | Odds Ratio | SE    | df  | z-ratio | p-value |
|---------------|-------------|--------------------------------------|------------|-------|-----|---------|---------|
| Rubble / Sand | 4-8 cm      | 0.1                                  | 2.354      | 0.609 | Inf | 3.313   | 0.001   |
| Rubble / Sand | 9-15 cm     | 0.1                                  | 1.130      | 0.286 | Inf | 0.482   | 0.630   |
| Rubble / Sand | 16-23 cm    | 0.1                                  | 1.441      | 0.392 | Inf | 1.343   | 0.179   |
| Rubble / Sand | 24-39 cm    | 0.1                                  | 2.062      | 0.556 | Inf | 2.686   | 0.007   |
| Rubble / Sand | 4-8 cm      | 0.2                                  | 0.429      | 0.092 | Inf | -3.967  | <0.001  |
| Rubble / Sand | 9-15 cm     | 0.2                                  | 0.613      | 0.106 | Inf | -2.839  | 0.005   |
| Rubble / Sand | 16-23 cm    | 0.2                                  | 1.033      | 0.174 | Inf | 0.190   | 0.849   |
| Rubble / Sand | 24-39 cm    | 0.2                                  | 1.386      | 0.232 | Inf | 1.952   | 0.051   |
| Rubble / Sand | 4-8 cm      | 0.3                                  | 0.078      | 0.038 | Inf | -5.227  | <0.001  |
| Rubble / Sand | 9-15 cm     | 0.3                                  | 0.333      | 0.076 | Inf | -4.800  | <0.001  |
| Rubble / Sand | 16-23 cm    | 0.3                                  | 0.740      | 0.165 | Inf | -1.355  | 0.176   |
| Rubble / Sand | 24-39 cm    | 0.3                                  | 0.931      | 0.177 | Inf | -0.375  | 0.708   |
| Rubble / Sand | 4-8 cm      | 0.4                                  | 0.014      | 0.011 | Inf | -5.299  | <0.001  |
| Rubble / Sand | 9-15 cm     | 0.4                                  | 0.181      | 0.066 | Inf | -4.701  | <0.001  |
| Rubble / Sand | 16-23 cm    | 0.4                                  | 0.530      | 0.196 | Inf | -1.715  | 0.086   |
| Rubble / Sand | 24-39 cm    | 0.4                                  | 0.626      | 0.196 | Inf | -1.500  | 0.134   |
| Rubble / Sand | 4-8 cm      | 0.1                                  | 2.354      | 0.609 | Inf | 3.313   | 0.001   |
| Rubble / Sand | 9-15 cm     | 0.1                                  | 1.130      | 0.286 | Inf | 0.482   | 0.630   |
| Rubble / Sand | 16-23 cm    | 0.1                                  | 1.441      | 0.392 | Inf | 1.343   | 0.179   |
| Rubble / Sand | 24-39 cm    | 0.1                                  | 2.062      | 0.556 | Inf | 2.686   | 0.007   |
| Rubble / Sand | 4-8 cm      | 0.2                                  | 0.429      | 0.092 | Inf | -3.967  | <0.001  |
| Rubble / Sand | 9-15 cm     | 0.2                                  | 0.613      | 0.106 | Inf | -2.839  | 0.005   |



| Contrast      | Rubble size | Near-bed wave orbital velocity (m/s) | Odds Ratio | SE    | df  | z-ratio | p-value |
|---------------|-------------|--------------------------------------|------------|-------|-----|---------|---------|
| Rubble / Sand | 16-23 cm    | 0.2                                  | 1.033      | 0.174 | Inf | 0.190   | 0.849   |
| Rubble / Sand | 24-39 cm    | 0.2                                  | 1.386      | 0.232 | Inf | 1.952   | 0.051   |
| Rubble / Sand | 4-8 cm      | 0.3                                  | 0.078      | 0.038 | Inf | -5.227  | <0.001  |
| Rubble / Sand | 9-15 cm     | 0.3                                  | 0.333      | 0.076 | Inf | -4.800  | <0.001  |
| Rubble / Sand | 16-23 cm    | 0.3                                  | 0.740      | 0.165 | Inf | -1.355  | 0.176   |
| Rubble / Sand | 24-39 cm    | 0.3                                  | 0.931      | 0.177 | Inf | -0.375  | 0.708   |
| Rubble / Sand | 4-8 cm      | 0.4                                  | 0.014      | 0.011 | Inf | -5.299  | <0.001  |
| Rubble / Sand | 9-15 cm     | 0.4                                  | 0.181      | 0.066 | Inf | -4.701  | <0.001  |
| Rubble / Sand | 16-23 cm    | 0.4                                  | 0.530      | 0.196 | Inf | -1.715  | 0.086   |
| Rubble / Sand | 24-39 cm    | 0.4                                  | 0.626      | 0.196 | Inf | -1.500  | 0.134   |

57 Table S8 Pairwise comparisons between four different rubble size categories for each level of branchiness and 4 levels of continuous variable ‘velocity’ (0.01 m/s, 0.2 m/s (mean), 0.3  
58 m/s, 0.4 m/s) for model described in Table S2.

| Size comparison     | Rubble branchiness | Near-bed wave orbital velocity (m/s) | Odds Ratio | SE       | df  | z-ratio | p-value |
|---------------------|--------------------|--------------------------------------|------------|----------|-----|---------|---------|
| 4-8 cm / 9-15 cm    | Unbranched         | 0.1                                  | 0.7948     | 2.03E-01 | Inf | -0.901  | 0.8043  |
| 4-8 cm / 16-23 cm   | Unbranched         | 0.1                                  | 0.7549     | 1.73E-01 | Inf | -1.23   | 0.6078  |
| 4-8 cm / 24-39 cm   | Unbranched         | 0.1                                  | 0.6975     | 1.56E-01 | Inf | -1.612  | 0.3715  |
| 9-15 cm / 16-23 cm  | Unbranched         | 0.1                                  | 0.9498     | 2.68E-01 | Inf | -0.182  | 0.9979  |
| 9-15 cm / 24-39 cm  | Unbranched         | 0.1                                  | 0.8777     | 2.44E-01 | Inf | -0.47   | 0.9657  |
| 16-23 cm / 24-39 cm | Unbranched         | 0.1                                  | 0.9241     | 2.36E-01 | Inf | -0.309  | 0.9898  |
| 4-8 cm / 9-15 cm    | Branched           | 0.1                                  | 0.2063     | 5.38E-02 | Inf | -6.057  | <.0001  |
| 4-8 cm / 16-23 cm   | Branched           | 0.1                                  | 0.3421     | 9.55E-02 | Inf | -3.843  | 0.0007  |

| Size comparison     | Rubble branchiness | Near-bed wave orbital velocity (m/s) | Odds Ratio | SE       | df  | z-ratio | p-value |
|---------------------|--------------------|--------------------------------------|------------|----------|-----|---------|---------|
| 4-8 cm / 24-39 cm   | Branched           | 0.1                                  | 0.4416     | 1.21E-01 | Inf | -2.984  | 0.0151  |
| 9-15 cm / 16-23 cm  | Branched           | 0.1                                  | 1.6584     | 3.72E-01 | Inf | 2.253   | 0.1093  |
| 9-15 cm / 24-39 cm  | Branched           | 0.1                                  | 2.1406     | 4.70E-01 | Inf | 3.463   | 0.003   |
| 16-23 cm / 24-39 cm | Branched           | 0.1                                  | 1.2908     | 3.13E-01 | Inf | 1.053   | 0.7181  |
| 4-8 cm / 9-15 cm    | Unbranched         | 0.2                                  | 1.8795     | 4.74E-01 | Inf | 2.502   | 0.0596  |
| 4-8 cm / 16-23 cm   | Unbranched         | 0.2                                  | 6.5106     | 1.31E+00 | Inf | 9.294   | <.0001  |
| 4-8 cm / 24-39 cm   | Unbranched         | 0.2                                  | 1.5403     | 3.47E-01 | Inf | 1.916   | 0.2214  |
| 9-15 cm / 16-23 cm  | Unbranched         | 0.2                                  | 3.4641     | 8.42E-01 | Inf | 5.113   | <.0001  |
| 9-15 cm / 24-39 cm  | Unbranched         | 0.2                                  | 0.8196     | 2.16E-01 | Inf | -0.755  | 0.8744  |
| 16-23 cm / 24-39 cm | Unbranched         | 0.2                                  | 0.2366     | 4.98E-02 | Inf | -6.849  | <.0001  |
| 4-8 cm / 9-15 cm    | Branched           | 0.2                                  | 1.2199     | 1.86E-01 | Inf | 1.301   | 0.5625  |
| 4-8 cm / 16-23 cm   | Branched           | 0.2                                  | 1.1702     | 1.89E-01 | Inf | 0.973   | 0.7651  |
| 4-8 cm / 24-39 cm   | Branched           | 0.2                                  | 2.026      | 3.25E-01 | Inf | 4.395   | 0.0001  |
| 9-15 cm / 16-23 cm  | Branched           | 0.2                                  | 0.9593     | 1.28E-01 | Inf | -0.311  | 0.9896  |
| 9-15 cm / 24-39 cm  | Branched           | 0.2                                  | 1.6607     | 2.20E-01 | Inf | 3.821   | 0.0008  |
| 16-23 cm / 24-39 cm | Branched           | 0.2                                  | 1.7312     | 2.47E-01 | Inf | 3.847   | 0.0007  |
| 4-8 cm / 9-15 cm    | Unbranched         | 0.3                                  | 4.4445     | 2.29E+00 | Inf | 2.895   | 0.0198  |
| 4-8 cm / 16-23 cm   | Unbranched         | 0.3                                  | 56.1546    | 2.20E+01 | Inf | 10.288  | <.0001  |
| 4-8 cm / 24-39 cm   | Unbranched         | 0.3                                  | 3.4014     | 1.58E+00 | Inf | 2.638   | 0.0415  |
| 9-15 cm / 16-23 cm  | Unbranched         | 0.3                                  | 12.6346    | 5.66E+00 | Inf | 5.666   | <.0001  |
| 9-15 cm / 24-39 cm  | Unbranched         | 0.3                                  | 0.7653     | 3.92E-01 | Inf | -0.522  | 0.9537  |
| 16-23 cm / 24-39 cm | Unbranched         | 0.3                                  | 0.0606     | 2.27E-02 | Inf | -7.481  | <.0001  |
| 4-8 cm / 9-15 cm    | Branched           | 0.3                                  | 7.2143     | 2.06E+00 | Inf | 6.92    | <.0001  |
| 4-8 cm / 16-23 cm   | Branched           | 0.3                                  | 4.003      | 1.18E+00 | Inf | 4.718   | <.0001  |

| Size comparison     | Rubble branchiness | Near-bed wave orbital velocity (m/s) | Odds Ratio | SE       | df  | z-ratio | p-value |
|---------------------|--------------------|--------------------------------------|------------|----------|-----|---------|---------|
| 4-8 cm / 24-39 cm   | Branched           | 0.3                                  | 9.2948     | 2.61E+00 | Inf | 7.941   | <.0001  |
| 9-15 cm / 16-23 cm  | Branched           | 0.3                                  | 0.5549     | 9.15E-02 | Inf | -3.572  | 0.002   |
| 9-15 cm / 24-39 cm  | Branched           | 0.3                                  | 1.2884     | 1.81E-01 | Inf | 1.806   | 0.2704  |
| 16-23 cm / 24-39 cm | Branched           | 0.3                                  | 2.3219     | 3.62E-01 | Inf | 5.4     | <.0001  |
| 4-8 cm / 9-15 cm    | Unbranched         | 0.4                                  | 10.5103    | 8.61E+00 | Inf | 2.872   | 0.0212  |
| 4-8 cm / 16-23 cm   | Unbranched         | 0.4                                  | 484.336    | 3.03E+02 | Inf | 9.897   | <.0001  |
| 4-8 cm / 24-39 cm   | Unbranched         | 0.4                                  | 7.511      | 5.54E+00 | Inf | 2.736   | 0.0316  |
| 9-15 cm / 16-23 cm  | Unbranched         | 0.4                                  | 46.0819    | 3.27E+01 | Inf | 5.396   | <.0001  |
| 9-15 cm / 24-39 cm  | Unbranched         | 0.4                                  | 0.7146     | 5.79E-01 | Inf | -0.415  | 0.9759  |
| 16-23 cm / 24-39 cm | Unbranched         | 0.4                                  | 0.0155     | 9.22E-03 | Inf | -7.004  | <.0001  |
| 4-8 cm / 9-15 cm    | Branched           | 0.4                                  | 42.6628    | 2.10E+01 | Inf | 7.623   | <.0001  |
| 4-8 cm / 16-23 cm   | Branched           | 0.4                                  | 13.6931    | 6.97E+00 | Inf | 5.144   | <.0001  |
| 4-8 cm / 24-39 cm   | Branched           | 0.4                                  | 42.6438    | 2.06E+01 | Inf | 7.756   | <.0001  |
| 9-15 cm / 16-23 cm  | Branched           | 0.4                                  | 0.321      | 8.98E-02 | Inf | -4.06   | 0.0003  |
| 9-15 cm / 24-39 cm  | Branched           | 0.4                                  | 0.9996     | 2.33E-01 | Inf | -0.002  | 1       |
| 16-23 cm / 24-39 cm | Branched           | 0.4                                  | 3.1143     | 8.28E-01 | Inf | 4.272   | 0.0001  |

59 **Table S9 Anova table of model “fl.t.global” describing the effect of velocity, rubble size, branchiness and underlying substrate on the probability of transport of rubble pieces.**

| Model term                    | LR $\chi^2$ | df | p-value ( $>\chi^2$ ) |
|-------------------------------|-------------|----|-----------------------|
| calculated.velocity_corrected | 2188.332    | 1  | <0.001                |
| size                          | 175.957     | 3  | <0.001                |
| substrate                     | 2.292       | 1  | 0.130                 |

| Model term                                   | LR $\chi^2$ | df | p-value<br>( $>\chi^2$ ) |
|----------------------------------------------|-------------|----|--------------------------|
| branched                                     | 289.922     | 1  | <0.001                   |
| calculated.velocity_corrected:size           | 50.249      | 3  | <0.001                   |
| calculated.velocity_corrected:substrate      | 8.485       | 1  | 0.004                    |
| calculated.velocity_corrected:branched       | 0.285       | 1  | 0.593                    |
| size:substrate                               | 25.755      | 3  | <0.001                   |
| size:branched                                | 21.922      | 3  | <0.001                   |
| substrate:branched                           | 0.762       | 1  | 0.383                    |
| calculated.velocity_corrected:size:branched  | 17.569      | 3  | 0.001                    |
| calculated.velocity_corrected:size:substrate | 8.940       | 3  | 0.030                    |

60

61

62

**Table S10** Pairwise comparisons between two levels of branchiness for 4 rubble size classes and 4 levels of continuous variable ‘velocity’ (0.01 m/s, 0.2 m/s (mean), 0.3 m/s, 0.4 m/s) for model described in Table S6.

| Branchiness comparison | Rubble size | Near-bed wave orbital velocity (m/s) | Odds Ratio | SE    | df  | z-ratio | p-value |
|------------------------|-------------|--------------------------------------|------------|-------|-----|---------|---------|
| Unbranched / Branched  | 4-8 cm      | 0.1                                  | 8.263      | 3.257 | Inf | 5.358   | <0.001  |
| Unbranched / Branched  | 9-15 cm     | 0.1                                  | 2.340      | 0.860 | Inf | 2.312   | 0.021   |
| Unbranched / Branched  | 16-23 cm    | 0.1                                  | 3.677      | 1.390 | Inf | 3.445   | 0.001   |
| Unbranched / Branched  | 24-39 cm    | 0.1                                  | 6.284      | 2.737 | Inf | 4.219   | <0.001  |
| Unbranched / Branched  | 4-8 cm      | 0.196                                | 4.437      | 0.900 | Inf | 7.345   | <0.001  |
| Unbranched / Branched  | 9-15 cm     | 0.196                                | 4.335      | 0.906 | Inf | 7.015   | <0.001  |
| Unbranched / Branched  | 16-23 cm    | 0.196                                | 2.860      | 0.619 | Inf | 4.853   | <0.001  |
| Unbranched / Branched  | 24-39 cm    | 0.196                                | 5.898      | 1.505 | Inf | 6.956   | <0.001  |
| Unbranched / Branched  | 4-8 cm      | 0.3                                  | 2.268      | 0.474 | Inf | 3.918   | <0.001  |

| Branchiness comparison | Rubble size | Near-bed wave orbital velocity (m/s) | Odds Ratio | SE    | df  | z-ratio | p-value |
|------------------------|-------------|--------------------------------------|------------|-------|-----|---------|---------|
| Unbranched / Branched  | 9-15 cm     | 0.3                                  | 8.433      | 1.916 | Inf | 9.383   | <0.001  |
| Unbranched / Branched  | 16-23 cm    | 0.3                                  | 2.181      | 0.366 | Inf | 4.654   | <0.001  |
| Unbranched / Branched  | 24-39 cm    | 0.3                                  | 5.508      | 0.967 | Inf | 9.722   | <0.001  |
| Unbranched / Branched  | 4-8 cm      | 0.4                                  | 1.188      | 0.489 | Inf | 0.419   | 0.675   |
| Unbranched / Branched  | 9-15 cm     | 0.4                                  | 16.010     | 6.482 | Inf | 6.850   | <0.001  |
| Unbranched / Branched  | 16-23 cm    | 0.4                                  | 1.680      | 0.513 | Inf | 1.700   | 0.089   |
| Unbranched / Branched  | 24-39 cm    | 0.4                                  | 5.156      | 1.599 | Inf | 5.289   | <0.001  |

63

64

Table S11 Pairwise comparisons between four categories of rubble ‘length’ for each level of morphology and 4 levels of continuous variable ‘velocity’ (0.1 m/s, 0.2 m/s (mean), 0.3 m/s, and 0.4 m/s) for model described in Table S6.

65

| Size comparison     | Rubble branchiness | Near-bed wave orbital velocity (m/s) | Odds Ratio | SE    | df  | z-ratio | p-value |
|---------------------|--------------------|--------------------------------------|------------|-------|-----|---------|---------|
| 4-8 cm / 9-15 cm    | Unbranched         | 0.1                                  | 0.734      | 0.277 | Inf | -0.819  | 0.846   |
| 4-8 cm / 16-23 cm   | Unbranched         | 0.1                                  | 0.713      | 0.255 | Inf | -0.946  | 0.780   |
| 4-8 cm / 24-39 cm   | Unbranched         | 0.1                                  | 0.871      | 0.313 | Inf | -0.385  | 0.981   |
| 9-15 cm / 16-23 cm  | Unbranched         | 0.1                                  | 0.972      | 0.417 | Inf | -0.066  | 0.999   |
| 9-15 cm / 24-39 cm  | Unbranched         | 0.1                                  | 1.186      | 0.511 | Inf | 0.396   | 0.979   |
| 16-23 cm / 24-39 cm | Unbranched         | 0.1                                  | 1.221      | 0.504 | Inf | 0.482   | 0.963   |
| 4-8 cm / 9-15 cm    | Branched           | 0.1                                  | 0.208      | 0.090 | Inf | -3.622  | 0.002   |
| 4-8 cm / 16-23 cm   | Branched           | 0.1                                  | 0.317      | 0.149 | Inf | -2.453  | 0.068   |
| 4-8 cm / 24-39 cm   | Branched           | 0.1                                  | 0.662      | 0.336 | Inf | -0.812  | 0.849   |
| 9-15 cm / 16-23 cm  | Branched           | 0.1                                  | 1.528      | 0.588 | Inf | 1.101   | 0.689   |
| 9-15 cm / 24-39 cm  | Branched           | 0.1                                  | 3.186      | 1.380 | Inf | 2.675   | 0.038   |

| Size comparison     | Rubble branchiness | Near-bed wave orbital velocity (m/s) | Odds Ratio | SE    | df  | z-ratio | p-value |
|---------------------|--------------------|--------------------------------------|------------|-------|-----|---------|---------|
| 16-23 cm / 24-39 cm | Branched           | 0.1                                  | 2.086      | 0.975 | Inf | 1.573   | 0.394   |
| 4-8 cm / 9-15 cm    | Unbranched         | 0.196                                | 0.995      | 0.205 | Inf | -0.025  | 0.999   |
| 4-8 cm / 16-23 cm   | Unbranched         | 0.196                                | 1.684      | 0.330 | Inf | 2.659   | 0.039   |
| 4-8 cm / 24-39 cm   | Unbranched         | 0.196                                | 1.983      | 0.394 | Inf | 3.442   | 0.003   |
| 9-15 cm / 16-23 cm  | Unbranched         | 0.196                                | 1.693      | 0.406 | Inf | 2.197   | 0.124   |
| 9-15 cm / 24-39 cm  | Unbranched         | 0.196                                | 1.993      | 0.485 | Inf | 2.835   | 0.024   |
| 16-23 cm / 24-39 cm | Unbranched         | 0.196                                | 1.177      | 0.276 | Inf | 0.694   | 0.900   |
| 4-8 cm / 9-15 cm    | Branched           | 0.196                                | 0.972      | 0.221 | Inf | -0.125  | 0.999   |
| 4-8 cm / 16-23 cm   | Branched           | 0.196                                | 1.086      | 0.267 | Inf | 0.336   | 0.987   |
| 4-8 cm / 24-39 cm   | Branched           | 0.196                                | 2.635      | 0.735 | Inf | 3.474   | 0.003   |
| 9-15 cm / 16-23 cm  | Branched           | 0.196                                | 1.117      | 0.245 | Inf | 0.507   | 0.958   |
| 9-15 cm / 24-39 cm  | Branched           | 0.196                                | 2.711      | 0.695 | Inf | 3.893   | 0.001   |
| 16-23 cm / 24-39 cm | Branched           | 0.196                                | 2.427      | 0.662 | Inf | 3.249   | 0.006   |
| 4-8 cm / 9-15 cm    | Unbranched         | 0.3                                  | 1.381      | 0.368 | Inf | 1.211   | 0.620   |
| 4-8 cm / 16-23 cm   | Unbranched         | 0.3                                  | 4.257      | 0.916 | Inf | 6.734   | <0.001  |
| 4-8 cm / 24-39 cm   | Unbranched         | 0.3                                  | 4.818      | 1.066 | Inf | 7.109   | <0.001  |
| 9-15 cm / 16-23 cm  | Unbranched         | 0.3                                  | 3.082      | 0.776 | Inf | 4.470   | <0.001  |
| 9-15 cm / 24-39 cm  | Unbranched         | 0.3                                  | 3.488      | 0.898 | Inf | 4.852   | <0.001  |
| 16-23 cm / 24-39 cm | Unbranched         | 0.3                                  | 1.132      | 0.226 | Inf | 0.618   | 0.926   |
| 4-8 cm / 9-15 cm    | Branched           | 0.3                                  | 5.136      | 0.899 | Inf | 9.348   | <0.001  |
| 4-8 cm / 16-23 cm   | Branched           | 0.3                                  | 4.094      | 0.734 | Inf | 7.866   | <0.001  |
| 4-8 cm / 24-39 cm   | Branched           | 0.3                                  | 11.699     | 2.159 | Inf | 13.329  | <0.001  |
| 9-15 cm / 16-23 cm  | Branched           | 0.3                                  | 0.797      | 0.103 | Inf | -1.753  | 0.297   |
| 9-15 cm / 24-39 cm  | Branched           | 0.3                                  | 2.278      | 0.311 | Inf | 6.022   | <0.001  |

| Size comparison     | Rubble branchiness | Near-bed wave orbital velocity (m/s) | Odds Ratio | SE     | df  | z-ratio | p-value |
|---------------------|--------------------|--------------------------------------|------------|--------|-----|---------|---------|
| 16-23 cm / 24-39 cm | Branched           | 0.3                                  | 2.857      | 0.406  | Inf | 7.389   | <0.001  |
| 4-8 cm / 9-15 cm    | Unbranched         | 0.4                                  | 1.895      | 0.916  | Inf | 1.322   | 0.549   |
| 4-8 cm / 16-23 cm   | Unbranched         | 0.4                                  | 10.400     | 4.104  | Inf | 5.935   | <0.001  |
| 4-8 cm / 24-39 cm   | Unbranched         | 0.4                                  | 11.333     | 4.562  | Inf | 6.031   | <0.001  |
| 9-15 cm / 16-23 cm  | Unbranched         | 0.4                                  | 5.489      | 2.509  | Inf | 3.724   | 0.001   |
| 9-15 cm / 24-39 cm  | Unbranched         | 0.4                                  | 5.981      | 2.768  | Inf | 3.864   | 0.001   |
| 16-23 cm / 24-39 cm | Unbranched         | 0.4                                  | 1.090      | 0.397  | Inf | 0.235   | 0.995   |
| 4-8 cm / 9-15 cm    | Branched           | 0.4                                  | 25.529     | 9.372  | Inf | 8.825   | <0.001  |
| 4-8 cm / 16-23 cm   | Branched           | 0.4                                  | 14.704     | 5.606  | Inf | 7.051   | <0.001  |
| 4-8 cm / 24-39 cm   | Branched           | 0.4                                  | 49.175     | 18.392 | Inf | 10.415  | <0.001  |
| 9-15 cm / 16-23 cm  | Branched           | 0.4                                  | 0.576      | 0.144  | Inf | -2.214  | 0.120   |
| 9-15 cm / 24-39 cm  | Branched           | 0.4                                  | 1.926      | 0.458  | Inf | 2.755   | 0.030   |
| 16-23 cm / 24-39 cm | Branched           | 0.4                                  | 3.344      | 0.867  | Inf | 4.659   | <0.001  |

66

67 Table S12 Pairwise comparisons between sand and rubble substrate for each level of 'size' and 4 levels of continuous variable 'velocity' (0.1 m/s, 0.2 m/s (mean), 0.3 m/s and 0.4 m/s)  
68 for model described in Table S6.

| Substrate comparison | Rubble size | Near-bed wave orbital velocity (m/s) | Odds Ratio | SE    | df  | z-ratio | p-value |
|----------------------|-------------|--------------------------------------|------------|-------|-----|---------|---------|
| Rubble / Sand        | 4-8 cm      | 0.1                                  | 2.011      | 0.764 | Inf | 1.840   | 0.066   |
| Rubble / Sand        | 9-15 cm     | 0.1                                  | 1.092      | 0.447 | Inf | 0.215   | 0.830   |
| Rubble / Sand        | 16-23 cm    | 0.1                                  | 1.728      | 0.787 | Inf | 1.200   | 0.230   |
| Rubble / Sand        | 24-39 cm    | 0.1                                  | 1.305      | 0.630 | Inf | 0.552   | 0.581   |
| Rubble / Sand        | 4-8 cm      | 0.196                                | 0.879      | 0.168 | Inf | -0.678  | 0.498   |
| Rubble / Sand        | 9-15 cm     | 0.196                                | 0.909      | 0.216 | Inf | -0.402  | 0.688   |

| Substrate comparison | Rubble size | Near-bed wave orbital velocity (m/s) | Odds Ratio | SE    | df  | z-ratio | p-value |
|----------------------|-------------|--------------------------------------|------------|-------|-----|---------|---------|
| Rubble / Sand        | 16-23 cm    | 0.196                                | 1.100      | 0.281 | Inf | 0.372   | 0.710   |
| Rubble / Sand        | 24-39 cm    | 0.196                                | 1.452      | 0.410 | Inf | 1.321   | 0.187   |
| Rubble / Sand        | 4-8 cm      | 0.3                                  | 0.359      | 0.087 | Inf | -4.224  | <0.001  |
| Rubble / Sand        | 9-15 cm     | 0.3                                  | 0.746      | 0.130 | Inf | -1.688  | 0.091   |
| Rubble / Sand        | 16-23 cm    | 0.3                                  | 0.675      | 0.110 | Inf | -2.419  | 0.016   |
| Rubble / Sand        | 24-39 cm    | 0.3                                  | 1.629      | 0.270 | Inf | 2.949   | 0.003   |
| Rubble / Sand        | 4-8 cm      | 0.4                                  | 0.152      | 0.071 | Inf | -4.051  | <0.001  |
| Rubble / Sand        | 9-15 cm     | 0.4                                  | 0.616      | 0.192 | Inf | -1.553  | 0.121   |
| Rubble / Sand        | 16-23 cm    | 0.4                                  | 0.422      | 0.135 | Inf | -2.705  | 0.007   |
| Rubble / Sand        | 24-39 cm    | 0.4                                  | 1.820      | 0.539 | Inf | 2.021   | 0.043   |
| Rubble / Sand        | 4-8 cm      | 0.1                                  | 2.011      | 0.764 | Inf | 1.840   | 0.066   |
| Rubble / Sand        | 9-15 cm     | 0.1                                  | 1.092      | 0.447 | Inf | 0.215   | 0.830   |
| Rubble / Sand        | 16-23 cm    | 0.1                                  | 1.728      | 0.787 | Inf | 1.200   | 0.230   |
| Rubble / Sand        | 24-39 cm    | 0.1                                  | 1.305      | 0.630 | Inf | 0.552   | 0.581   |
| Rubble / Sand        | 4-8 cm      | 0.196                                | 0.879      | 0.168 | Inf | -0.678  | 0.498   |
| Rubble / Sand        | 9-15 cm     | 0.196                                | 0.909      | 0.216 | Inf | -0.402  | 0.688   |
| Rubble / Sand        | 16-23 cm    | 0.196                                | 1.100      | 0.281 | Inf | 0.372   | 0.710   |
| Rubble / Sand        | 24-39 cm    | 0.196                                | 1.452      | 0.410 | Inf | 1.321   | 0.187   |
| Rubble / Sand        | 4-8 cm      | 0.3                                  | 0.359      | 0.087 | Inf | -4.224  | <0.001  |
| Rubble / Sand        | 9-15 cm     | 0.3                                  | 0.746      | 0.130 | Inf | -1.688  | 0.091   |
| Rubble / Sand        | 16-23 cm    | 0.3                                  | 0.675      | 0.110 | Inf | -2.419  | 0.016   |
| Rubble / Sand        | 24-39 cm    | 0.3                                  | 1.629      | 0.270 | Inf | 2.949   | 0.003   |
| Rubble / Sand        | 4-8 cm      | 0.4                                  | 0.152      | 0.071 | Inf | -4.051  | <0.001  |
| Rubble / Sand        | 9-15 cm     | 0.4                                  | 0.616      | 0.192 | Inf | -1.553  | 0.121   |



| Substrate comparison | Rubble size | Near-bed wave orbital velocity (m/s) | Odds Ratio | SE    | df  | z-ratio | p-value |
|----------------------|-------------|--------------------------------------|------------|-------|-----|---------|---------|
| Rubble / Sand        | 16-23 cm    | 0.4                                  | 0.422      | 0.135 | Inf | -2.705  | 0.007   |
| Rubble / Sand        | 24-39 cm    | 0.4                                  | 1.820      | 0.539 | Inf | 2.021   | 0.043   |

69

70 **Table S13 Anova table of model “fl.f.global2” describing the effect of velocity, rubble size, branchiness and underlying substrate on the probability of flipping of rubble pieces.**

| Model term                                   | LR $\chi^2$ | Df | Pr(> $\chi^2$ ) |
|----------------------------------------------|-------------|----|-----------------|
| calculated.velocity_corrected                | 1550.877    | 1  | <0.001          |
| size                                         | 323.197     | 3  | <0.001          |
| substrate                                    | 7.253       | 1  | 0.007           |
| branched                                     | 533.511     | 1  | <0.001          |
| calculated.velocity_corrected:size           | 59.299      | 3  | <0.001          |
| calculated.velocity_corrected:substrate      | 1.919       | 1  | 0.166           |
| calculated.velocity_corrected:branched       | 1.003       | 1  | 0.317           |
| size:substrate                               | 21.392      | 3  | <0.001          |
| size:branched                                | 34.631      | 3  | <0.001          |
| substrate:branched                           | 19.138      | 1  | <0.001          |
| calculated.velocity_corrected:size:branched  | 18.363      | 3  | <0.001          |
| calculated.velocity_corrected:size:substrate | 10.738      | 3  | 0.013           |

71

72 **Table S14 Pairwise comparisons branched and unbranched rubble for each level of ‘size’ and 3 levels of continuous variable ‘velocity’ (0.1 m/s, 0.2 m/s (mean) and 0.4 m/s) for model**

73 **described in Table S10.**

| <b>Branchiness comparison</b> | <b>Rubble size</b> | <b>Near-bed wave orbital velocity (m/s)</b> | <b>Odds Ratio</b> | <b>SE</b> | <b>df</b> | <b>z-ratio</b> | <b>p-value</b> |
|-------------------------------|--------------------|---------------------------------------------|-------------------|-----------|-----------|----------------|----------------|
| Unbranched / Branched         | 4-8 cm             | 0.1                                         | 10.977            | 4.530     | Inf       | 5.805          | <0.001         |
| Unbranched / Branched         | 9-15 cm            | 0.1                                         | 3.241             | 1.273     | Inf       | 2.995          | 0.003          |
| Unbranched / Branched         | 16-23 cm           | 0.1                                         | 5.403             | 2.237     | Inf       | 4.074          | <0.001         |
| Unbranched / Branched         | 24-39 cm           | 0.1                                         | 42.522            | 32.482    | Inf       | 4.909          | <0.001         |
| Unbranched / Branched         | 4-8 cm             | 0.196                                       | 7.006             | 1.541     | Inf       | 8.852          | <0.001         |
| Unbranched / Branched         | 9-15 cm            | 0.196                                       | 7.459             | 1.676     | Inf       | 8.943          | <0.001         |
| Unbranched / Branched         | 16-23 cm           | 0.196                                       | 5.656             | 1.373     | Inf       | 7.136          | <0.001         |
| Unbranched / Branched         | 24-39 cm           | 0.196                                       | 33.922            | 16.101    | Inf       | 7.425          | <0.001         |
| Unbranched / Branched         | 4-8 cm             | 0.4                                         | 2.706             | 1.073     | Inf       | 2.512          | 0.012          |
| Unbranched / Branched         | 9-15 cm            | 0.4                                         | 43.609            | 17.966    | Inf       | 9.164          | <0.001         |
| Unbranched / Branched         | 16-23 cm           | 0.4                                         | 6.233             | 1.965     | Inf       | 5.805          | <0.001         |
| Unbranched / Branched         | 24-39 cm           | 0.4                                         | 21.016            | 8.938     | Inf       | 7.161          | <0.001         |
| Unbranched / Branched         | 4-8 cm             | 0.1                                         | 10.977            | 4.530     | Inf       | 5.805          | <0.001         |
| Unbranched / Branched         | 9-15 cm            | 0.1                                         | 3.241             | 1.273     | Inf       | 2.995          | 0.003          |
| Unbranched / Branched         | 16-23 cm           | 0.1                                         | 5.403             | 2.237     | Inf       | 4.074          | <0.001         |
| Unbranched / Branched         | 24-39 cm           | 0.1                                         | 42.522            | 32.482    | Inf       | 4.909          | <0.001         |
| Unbranched / Branched         | 4-8 cm             | 0.196                                       | 7.006             | 1.541     | Inf       | 8.852          | <0.001         |
| Unbranched / Branched         | 9-15 cm            | 0.196                                       | 7.459             | 1.676     | Inf       | 8.943          | <0.001         |
| Unbranched / Branched         | 16-23 cm           | 0.196                                       | 5.656             | 1.373     | Inf       | 7.136          | <0.001         |
| Unbranched / Branched         | 24-39 cm           | 0.196                                       | 33.922            | 16.101    | Inf       | 7.425          | <0.001         |
| Unbranched / Branched         | 4-8 cm             | 0.4                                         | 2.706             | 1.073     | Inf       | 2.512          | 0.012          |
| Unbranched / Branched         | 9-15 cm            | 0.4                                         | 43.609            | 17.966    | Inf       | 9.164          | <0.001         |
| Unbranched / Branched         | 16-23 cm           | 0.4                                         | 6.233             | 1.965     | Inf       | 5.805          | <0.001         |
| Unbranched / Branched         | 24-39 cm           | 0.4                                         | 21.016            | 8.938     | Inf       | 7.161          | <0.001         |

74 **Table S15** Pairwise comparisons between rubble size categories for each level of ‘morphology’ and 3 levels of continuous variable ‘velocity’ (0.1 m/s, 0.2 m/s (mean) and 0.4 m/s) for  
 75 model described in Table S10.

| Size comparison     | Rubble branchiness | Near-bed wave orbital velocity (m/s) | Odds Ratio | SE     | df  | z-ratio | p-value |
|---------------------|--------------------|--------------------------------------|------------|--------|-----|---------|---------|
| 4-8 cm / 9-15 cm    | Unbranched         | 0.1                                  | 0.741      | 0.279  | Inf | -0.796  | 0.857   |
| 4-8 cm / 16-23 cm   | Unbranched         | 0.1                                  | 0.662      | 0.228  | Inf | -1.198  | 0.628   |
| 4-8 cm / 24-39 cm   | Unbranched         | 0.1                                  | 0.965      | 0.366  | Inf | -0.094  | 0.999   |
| 9-15 cm / 16-23 cm  | Unbranched         | 0.1                                  | 0.893      | 0.377  | Inf | -0.268  | 0.993   |
| 9-15 cm / 24-39 cm  | Unbranched         | 0.1                                  | 1.301      | 0.588  | Inf | 0.583   | 0.937   |
| 16-23 cm / 24-39 cm | Unbranched         | 0.1                                  | 1.458      | 0.622  | Inf | 0.884   | 0.813   |
| 4-8 cm / 9-15 cm    | Branched           | 0.1                                  | 0.219      | 0.103  | Inf | -3.213  | 0.007   |
| 4-8 cm / 16-23 cm   | Branched           | 0.1                                  | 0.326      | 0.168  | Inf | -2.181  | 0.128   |
| 4-8 cm / 24-39 cm   | Branched           | 0.1                                  | 3.738      | 3.130  | Inf | 1.575   | 0.393   |
| 9-15 cm / 16-23 cm  | Branched           | 0.1                                  | 1.488      | 0.670  | Inf | 0.883   | 0.814   |
| 9-15 cm / 24-39 cm  | Branched           | 0.1                                  | 17.072     | 13.667 | Inf | 3.544   | 0.002   |
| 16-23 cm / 24-39 cm | Branched           | 0.1                                  | 11.473     | 9.473  | Inf | 2.955   | 0.017   |
| 4-8 cm / 9-15 cm    | Unbranched         | 0.196                                | 1.021      | 0.210  | Inf | 0.102   | 0.999   |
| 4-8 cm / 16-23 cm   | Unbranched         | 0.196                                | 1.712      | 0.329  | Inf | 2.799   | 0.026   |
| 4-8 cm / 24-39 cm   | Unbranched         | 0.196                                | 2.772      | 0.599  | Inf | 4.717   | <0.001  |
| 9-15 cm / 16-23 cm  | Unbranched         | 0.196                                | 1.676      | 0.400  | Inf | 2.166   | 0.133   |
| 9-15 cm / 24-39 cm  | Unbranched         | 0.196                                | 2.714      | 0.703  | Inf | 3.854   | 0.001   |
| 16-23 cm / 24-39 cm | Unbranched         | 0.196                                | 1.619      | 0.401  | Inf | 1.949   | 0.208   |
| 4-8 cm / 9-15 cm    | Branched           | 0.196                                | 1.087      | 0.280  | Inf | 0.325   | 0.988   |
| 4-8 cm / 16-23 cm   | Branched           | 0.196                                | 1.382      | 0.389  | Inf | 1.148   | 0.659   |
| 4-8 cm / 24-39 cm   | Branched           | 0.196                                | 13.421     | 6.755  | Inf | 5.159   | <0.001  |
| 9-15 cm / 16-23 cm  | Branched           | 0.196                                | 1.271      | 0.334  | Inf | 0.911   | 0.799   |

| Size comparison     | Rubble branchiness | Near-bed wave orbital velocity (m/s) | Odds Ratio | SE     | df  | z-ratio | p-value |
|---------------------|--------------------|--------------------------------------|------------|--------|-----|---------|---------|
| 9-15 cm / 24-39 cm  | Branched           | 0.196                                | 12.343     | 6.099  | Inf | 5.086   | <0.001  |
| 16-23 cm / 24-39 cm | Branched           | 0.196                                | 9.712      | 4.924  | Inf | 4.484   | <0.001  |
| 4-8 cm / 9-15 cm    | Unbranched         | 0.4                                  | 2.013      | 0.955  | Inf | 1.474   | 0.453   |
| 4-8 cm / 16-23 cm   | Unbranched         | 0.4                                  | 12.810     | 4.888  | Inf | 6.683   | <0.001  |
| 4-8 cm / 24-39 cm   | Unbranched         | 0.4                                  | 25.924     | 10.097 | Inf | 8.358   | <0.001  |
| 9-15 cm / 16-23 cm  | Unbranched         | 0.4                                  | 6.365      | 2.850  | Inf | 4.133   | <0.001  |
| 9-15 cm / 24-39 cm  | Unbranched         | 0.4                                  | 12.881     | 5.826  | Inf | 5.651   | <0.001  |
| 16-23 cm / 24-39 cm | Unbranched         | 0.4                                  | 2.024      | 0.713  | Inf | 2.002   | 0.187   |
| 4-8 cm / 9-15 cm    | Branched           | 0.4                                  | 32.430     | 11.517 | Inf | 9.796   | <0.001  |
| 4-8 cm / 16-23 cm   | Branched           | 0.4                                  | 29.505     | 10.896 | Inf | 9.165   | <0.001  |
| 4-8 cm / 24-39 cm   | Branched           | 0.4                                  | 201.319    | 91.599 | Inf | 11.659  | <0.001  |
| 9-15 cm / 16-23 cm  | Branched           | 0.4                                  | 0.910      | 0.265  | Inf | -0.324  | 0.988   |
| 9-15 cm / 24-39 cm  | Branched           | 0.4                                  | 6.208      | 2.438  | Inf | 4.650   | <0.001  |
| 16-23 cm / 24-39 cm | Branched           | 0.4                                  | 6.823      | 2.766  | Inf | 4.737   | <0.001  |

76 **Table S16** Pairwise comparisons between rubble and sand substrate for each level of ‘morphology’ and 3 levels of continuous variable ‘velocity’ (0.1 m/s, 0.2 m/s (mean) and 0.4 m/s)  
77 **for model described in Table S10.**

| Substrate comparison | Rubble size | Near-bed wave orbital velocity (m/s) | Odds Ratio | SE    | df  | z-ratio | p-value |
|----------------------|-------------|--------------------------------------|------------|-------|-----|---------|---------|
| Rubble / Sand        | Unbranched  | 0.1                                  | 1.091      | 0.267 | Inf | 0.354   | 0.723   |
| Rubble / Sand        | Branched    | 0.1                                  | 2.710      | 0.840 | Inf | 3.216   | 0.001   |
| Rubble / Sand        | Unbranched  | 0.196                                | 0.949      | 0.148 | Inf | -0.334  | 0.738   |
| Rubble / Sand        | Branched    | 0.196                                | 2.358      | 0.481 | Inf | 4.208   | <0.001  |
| Rubble / Sand        | Unbranched  | 0.4                                  | 0.708      | 0.176 | Inf | -1.388  | 0.165   |

| Substrate comparison | Rubble size | Near-bed wave orbital velocity (m/s) | Odds Ratio | SE    | df  | z-ratio | p-value |
|----------------------|-------------|--------------------------------------|------------|-------|-----|---------|---------|
| Rubble / Sand        | Branched    | 0.4                                  | 1.758      | 0.352 | Inf | 2.815   | 0.005   |
| Rubble / Sand        | Unbranched  | 0.1                                  | 1.091      | 0.267 | Inf | 0.354   | 0.723   |
| Rubble / Sand        | Branched    | 0.1                                  | 2.710      | 0.840 | Inf | 3.216   | 0.001   |
| Rubble / Sand        | Unbranched  | 0.196                                | 0.949      | 0.148 | Inf | -0.334  | 0.738   |
| Rubble / Sand        | Branched    | 0.196                                | 2.358      | 0.481 | Inf | 4.208   | <0.001  |
| Rubble / Sand        | Unbranched  | 0.4                                  | 0.708      | 0.176 | Inf | -1.388  | 0.165   |
| Rubble / Sand        | Branched    | 0.4                                  | 1.758      | 0.352 | Inf | 2.815   | 0.005   |

78 Table S17 Anova table of model “lockmove2” and Anova table of model “lockflip”.

|                                    | LR $\chi^2$ | Df | Pr(> $\chi^2$ ) |
|------------------------------------|-------------|----|-----------------|
| <b>Transport</b>                   |             |    |                 |
| calculated.velocity_corrected      | 1.036       | 1  | 0.309           |
| size                               | 2.571       | 1  | 0.109           |
| calculated.velocity_corrected:size | 2.146       | 1  | 0.143           |
| <b>Flipping</b>                    |             |    |                 |
| calculated.velocity_corrected      | 1.626       | 1  | 0.202           |
| size                               | 2.152       | 1  | 0.142           |
| calculated.velocity_corrected:size | 9.3E-09     | 1  | 0.999           |

79 Table S18 The min, max and median recorded fastest near-bed wave orbital velocities in each habitat and monsoon season.

| Monsoon season | Habitat           | Peak near-bed wave orbital velocity (m/s) |        |        |
|----------------|-------------------|-------------------------------------------|--------|--------|
|                |                   | Min                                       | Median | Max    |
| North-eastern  | Lagoon            | 0.0847                                    | 0.163  | 0.217  |
|                | Sheltered Shallow | 0.0812                                    | 0.0977 | 0.224  |
|                | Sheltered Deep    | 0.0439                                    | 0.0524 | 0.0857 |
|                | Exposed Shallow   | 0.0501                                    | 0.13   | 0.215  |
|                | Exposed Deep      | 0.00868                                   | 0.0252 | 0.0324 |
| Western        | Lagoon            | 0.211                                     | 0.242  | 0.293  |
|                | Sheltered Shallow | 0.11                                      | 0.266  | 0.398  |
|                | Sheltered Deep    | 0.0583                                    | 0.129  | 0.185  |
|                | Exposed Shallow   | 0.114                                     | 0.184  | 0.429  |
|                | Exposed Deep      | 0.0603                                    | 0.0984 | 0.168  |

80 Table S19 Anova table of model “gamma1”.

| Model term         | $\chi^2$ | Df    | Pr(> $\chi^2$ ) |
|--------------------|----------|-------|-----------------|
| aspectDepth        | 533.057  | 4.000 | <0.001          |
| season             | 18.961   | 1.000 | <0.001          |
| aspectDepth:season | 54.204   | 4.000 | <0.001          |

81

82 Table S20 Pairwise comparisons between two monsoon seasons (W and NE monsoon) for 5 levels of ‘habitat’ (i.e, Lagoon shallow, Sheltered Shallow, Sheltered Deep, Exposed  
83 Shallow, Exposed Deep) for model “gamma1”.

| Monsoon comparison     | Habitat  | Odds Ratio | SE    | df  | z-ratio | p-value |
|------------------------|----------|------------|-------|-----|---------|---------|
| NE Monsoon / W Monsoon | Lag_Shal | 0.604      | 0.212 | Inf | -1.433  | 0.152   |

|                        |               |       |       |     |        |        |
|------------------------|---------------|-------|-------|-----|--------|--------|
| NE Monsoon / W Monsoon | Shelt_Shallow | 0.434 | 0.110 | Inf | -3.297 | 0.001  |
| NE Monsoon / W Monsoon | Shelt_Deep    | 0.480 | 0.121 | Inf | -2.903 | 0.004  |
| NE Monsoon / W Monsoon | Exp_Shallow   | 0.663 | 0.191 | Inf | -1.424 | 0.154  |
| NE Monsoon / W Monsoon | Exp_Deep      | 0.322 | 0.093 | Inf | -3.918 | <0.001 |

84 **Table S21 Pairwise comparisons for 5 levels of ‘habitat’ (i.e, Lagoon shallow, Sheltered Shallow, Sheltered Deep, Exposed Shallow, Exposed Deep) in each of two monsoon seasons (W**  
85 **and NE monsoon) for model “gamma1”.**

| Habitat comparison          | Monsoon    | Odds Ratio | SE    | df  | z-ratio | p-value |
|-----------------------------|------------|------------|-------|-----|---------|---------|
| Lag_Shallow / Shelt_Shallow | NE Monsoon | 1.343      | 0.410 | Inf | 0.966   | 0.871   |
| Lag_Shallow / Shelt_Deep    | NE Monsoon | 2.462      | 0.751 | Inf | 2.953   | 0.026   |
| Lag_Shallow / Exp_Shallow   | NE Monsoon | 1.102      | 0.355 | Inf | 0.302   | 0.998   |
| Lag_Shallow / Exp_Deep      | NE Monsoon | 4.046      | 1.301 | Inf | 4.345   | <0.001  |
| Shelt_Shallow / Shelt_Deep  | NE Monsoon | 1.834      | 0.113 | Inf | 9.866   | <0.001  |
| Shelt_Shallow / Exp_Shallow | NE Monsoon | 0.821      | 0.222 | Inf | -0.730  | 0.950   |
| Shelt_Shallow / Exp_Deep    | NE Monsoon | 3.013      | 0.815 | Inf | 4.080   | <0.001  |
| Shelt_Deep / Exp_Shallow    | NE Monsoon | 0.448      | 0.121 | Inf | -2.973  | 0.025   |
| Shelt_Deep / Exp_Deep       | NE Monsoon | 1.643      | 0.444 | Inf | 1.837   | 0.352   |
| Exp_Shallow / Exp_Deep      | NE Monsoon | 3.671      | 0.257 | Inf | 18.543  | <0.001  |
| Lag_Shallow / Shelt_Shallow | W Monsoon  | 0.965      | 0.296 | Inf | -0.117  | 1.000   |
| Lag_Shallow / Shelt_Deep    | W Monsoon  | 1.954      | 0.600 | Inf | 2.182   | 0.187   |
| Lag_Shallow / Exp_Shallow   | W Monsoon  | 1.208      | 0.389 | Inf | 0.588   | 0.977   |
| Lag_Shallow / Exp_Deep      | W Monsoon  | 2.158      | 0.694 | Inf | 2.391   | 0.118   |
| Shelt_Shallow / Shelt_Deep  | W Monsoon  | 2.026      | 0.171 | Inf | 8.342   | <0.001  |
| Shelt_Shallow / Exp_Shallow | W Monsoon  | 1.253      | 0.342 | Inf | 0.825   | 0.923   |

| Habitat comparison    | Monsoon   | Odds Ratio | SE    | df  | z-ratio | p-value |
|-----------------------|-----------|------------|-------|-----|---------|---------|
| Shelt_Shal / Exp_Deep | W Monsoon | 2.237      | 0.610 | Inf | 2.951   | 0.026   |
| Shelt_Deep / Exp_Shal | W Monsoon | 0.618      | 0.169 | Inf | -1.763- | 0.396   |
| Shelt_Deep / Exp_Deep | W Monsoon | 1.104      | 0.301 | Inf | 0.363   | 0.996   |
| Exp_Shal / Exp_Deep   | W Monsoon | 1.786      | 0.125 | Inf | 8.270   | <0.001  |

86

87 Table S22 Anova table for model “wmod”.

| Model term          | $\chi^2$ | Df    | Pr(> $\chi^2$ ) |
|---------------------|----------|-------|-----------------|
| fastest_peak_U      | 10.434   | 1.000 | 0.001           |
| day2                | 129.258  | 2.000 | <0.001          |
| fastest_peak_U:day2 | 11.284   | 2.000 | 0.004           |

88 Table S23 Anova table for model “wmod.fl”.

| Model term          | X2     | Df    | Pr(>X2) |
|---------------------|--------|-------|---------|
| fastest_peak_U      | 11.869 | 1.000 | 0.001   |
| day2                | 57.711 | 2.000 | 0.000   |
| fastest_peak_U:day2 | 7.416  | 2.000 | 0.025   |



89

90 **Table S24 Model predictions for probability of transport on each day in the western monsoon at 4 different velocities: 0.1, 0.2, 0.3 and 0.4 m/s, for model “wmod”.**

| Velocity | Day   | Probability of transport | SE    | df  | Lower confidence interval | Upper confidence interval |
|----------|-------|--------------------------|-------|-----|---------------------------|---------------------------|
| 0.1      | One   | 0.301                    | 0.038 | Inf | 0.233                     | 0.380                     |
| 0.2      | One   | 0.392                    | 0.035 | Inf | 0.326                     | 0.463                     |
| 0.3      | One   | 0.491                    | 0.043 | Inf | 0.408                     | 0.574                     |
| 0.4      | One   | 0.591                    | 0.057 | Inf | 0.477                     | 0.696                     |
| 0.1      | Two   | 0.208                    | 0.032 | Inf | 0.152                     | 0.278                     |
| 0.2      | Two   | 0.205                    | 0.026 | Inf | 0.159                     | 0.260                     |
| 0.3      | Two   | 0.201                    | 0.034 | Inf | 0.143                     | 0.275                     |
| 0.4      | Two   | 0.197                    | 0.049 | Inf | 0.118                     | 0.310                     |
| 0.1      | Three | 0.091                    | 0.019 | Inf | 0.060                     | 0.136                     |
| 0.2      | Three | 0.113                    | 0.018 | Inf | 0.083                     | 0.153                     |
| 0.3      | Three | 0.140                    | 0.030 | Inf | 0.091                     | 0.209                     |
| 0.4      | Three | 0.172                    | 0.054 | Inf | 0.090                     | 0.303                     |

91 **Table S25 Pairwise comparisons between each level of day, at three levels of velocity for model “wmod.fl”.**

| Velocity | Day | Probability of transport | SE    | df  | Lower confidence interval | Upper confidence interval |
|----------|-----|--------------------------|-------|-----|---------------------------|---------------------------|
| 0.1      | One | 0.125                    | 0.021 | Inf | 0.089                     | 0.172                     |
| 0.2      | One | 0.183                    | 0.021 | Inf | 0.146                     | 0.228                     |
| 0.3      | One | 0.261                    | 0.031 | Inf | 0.204                     | 0.327                     |
| 0.4      | One | 0.357                    | 0.055 | Inf | 0.257                     | 0.470                     |
| 0.1      | Two | 0.091                    | 0.018 | Inf | 0.061                     | 0.133                     |

| Velocity | Day   | Probability of transport | SE    | df  | Lower confidence interval | Upper confidence interval |
|----------|-------|--------------------------|-------|-----|---------------------------|---------------------------|
| 0.2      | Two   | 0.091                    | 0.014 | Inf | 0.067                     | 0.123                     |
| 0.3      | Two   | 0.091                    | 0.022 | Inf | 0.057                     | 0.143                     |
| 0.4      | Two   | 0.092                    | 0.034 | Inf | 0.044                     | 0.182                     |
| 0.1      | Three | 0.043                    | 0.011 | Inf | 0.025                     | 0.072                     |
| 0.2      | Three | 0.055                    | 0.010 | Inf | 0.038                     | 0.079                     |
| 0.3      | Three | 0.070                    | 0.020 | Inf | 0.039                     | 0.123                     |
| 0.4      | Three | 0.090                    | 0.041 | Inf | 0.035                     | 0.208                     |

92 Table S26 Anova table for model “wmod.dist2”.

| Model term     | X2     | Df    | Pr(>X2) |
|----------------|--------|-------|---------|
| fastest_peak_U | 7.110  | 1.000 | 0.008   |
| day2           | 17.275 | 2.000 | <0.001  |

93 Table S27 Model predictions for distance of transport, and pairwise comparisons between each level of day, at the average velocity in the western monsoon for model described in  
94 “wmod.dist2”.

| Day            | Distance transported | SE    | df      | Lower confidence interval | Upper confidence interval |
|----------------|----------------------|-------|---------|---------------------------|---------------------------|
| One            | 5.367                | 0.387 | 14.000  | 4.598                     | 6.265                     |
| Two            | 3.850                | 0.322 | 14.000  | 3.217                     | 4.607                     |
| Three          | 4.601                | 0.468 | 14.000  | 3.699                     | 5.723                     |
| Day comparison | Odds Ratio           | SE    | df      | z-ratio                   | p-value                   |
| One - Two      | 1.394                | 0.112 | 526.000 | 4.133                     | <0.001                    |
| One - Three    | 1.167                | 0.115 | 526.000 | 1.560                     | 0.264                     |
| Two - Three    | 0.837                | 0.088 | 526.000 | -1.688                    | 0.211                     |

95 Table S28 Anova table for model “nemod2”.

|                | $\chi^2$ | Df    | Pr(> $\chi^2$ ) |
|----------------|----------|-------|-----------------|
| fastest_peak_U | 2.270    | 1.000 | 0.132           |
| day2           | 7.304    | 2.000 | 0.026           |

96 Table S29 Anova table for model “nemod.fl2”.

| Model term     | X2     | Df    | Pr(>X2) |
|----------------|--------|-------|---------|
| fastest_peak_U | 3.727  | 1.000 | 0.054   |
| day2           | 28.091 | 2.000 | <0.001  |

97 Table S30 Pairwise comparisons between each level of day, at the average velocity (0.2 m/s) for model “nemod2”.

| Day            | Probability of transport | SE    | df  | Lower confidence interval | Upper confidence interval |
|----------------|--------------------------|-------|-----|---------------------------|---------------------------|
| One            | 0.217                    | 0.021 | Inf | 0.179                     | 0.260                     |
| Two            | 0.202                    | 0.020 | Inf | 0.165                     | 0.243                     |
| Three          | 0.157                    | 0.018 | Inf | 0.126                     | 0.195                     |
| Day comparison | Odds Ratio               | SE    | df  | z-ratio                   | p-value                   |
| One - Two      | 1.097                    | 0.160 | Inf | 0.635                     | 0.801                     |
| One - Three    | 1.484                    | 0.224 | Inf | 2.612                     | 0.024                     |
| Two - Three    | 1.353                    | 0.206 | Inf | 1.988                     | 0.115                     |

98 Table S31 Model predictions for probability of flipping on each day in the north-eastern monsoon, and pairwise comparisons between each level of day, at the average velocity for  
 99 model “nemod.fl2”.

| Day            | Probability of transport | SE    | df  | Lower confidence interval | Upper confidence interval |
|----------------|--------------------------|-------|-----|---------------------------|---------------------------|
| One            | 0.131                    | 0.018 | Inf | 0.100                     | 0.171                     |
| Two            | 0.063                    | 0.012 | Inf | 0.043                     | 0.090                     |
| Three          | 0.061                    | 0.011 | Inf | 0.042                     | 0.087                     |
| Day comparison | Odds Ratio               | SE    | df  | z-ratio                   | p-value                   |
| One - Two      | 2.269                    | 0.427 | Inf | 4.350                     | <0.001                    |
| One - Three    | 2.347                    | 0.446 | Inf | 4.489                     | <0.001                    |
| Two - Three    | 1.035                    | 0.216 | Inf | 0.163                     | 0.986                     |

100 Table S32 Anova table for model “nemod.dist2”.

|                | $\chi^2$ | Df    | Pr(> $\chi^2$ ) |
|----------------|----------|-------|-----------------|
| fastest_peak_U | 5.971    | 1.000 | 0.015           |
| day2           | 16.293   | 2.000 | <0.001          |

101 Table S33 Model predictions and pairwise comparisons between each level of day for the average velocity for model “nemod.dist2”.

| Day            | Distance transported | SE    | df  | Lower confidence interval | Upper confidence interval |
|----------------|----------------------|-------|-----|---------------------------|---------------------------|
| One            | 4.771                | 0.316 | 14  | 4.139                     | 5.499                     |
| Two            | 4.030                | 0.272 | 14  | 3.488                     | 4.657                     |
| Three          | 3.448                | 0.249 | 14  | 2.952                     | 4.026                     |
| Day comparison | Odds Ratio           | SE    | df  | z-ratio                   | p-value                   |
| One - Two      | 1.184                | 0.091 | 397 | 2.186                     | 0.075                     |

|             |       |       |     |       |        |
|-------------|-------|-------|-----|-------|--------|
| One - Three | 1.384 | 0.112 | 397 | 3.997 | <0.001 |
| Two - Three | 1.169 | 0.097 | 397 | 1.889 | 0.143  |

102

103 **Table S34 Model (ldmod) used for predictions of velocity thresholds for transport (sliding/walking/flipping) of 10%, 50% and 90% of rubble pieces averaged across different sizes,**  
104 **branchiness and substrate categories.**

| Model term     | $\chi^2$ | Df | Pr(> $\chi^2$ ) |
|----------------|----------|----|-----------------|
| fastest_peak_U | 33.468   | 1  | <0.001          |

105

**Table S35 Anova table of model “fi.m.senglob5”.**

| Model term                                    | X2     | Df    | Pr(>X2) |
|-----------------------------------------------|--------|-------|---------|
| fastest_peak_U                                | 32.624 | 1.000 | <0.001  |
| size_cat_adjusted_to_flume_exp                | 35.514 | 2.000 | <0.001  |
| branched                                      | 17.643 | 1.000 | <0.001  |
| starting_substrate_new                        | 0.438  | 2.000 | 0.803   |
| fastest_peak_U:size_cat_adjusted_to_flume_exp | 10.039 | 2.000 | 0.007   |

106

**Table S36 Pairwise comparisons between three different rubble size categories and 8 levels of continuous variable ‘velocity’ (0.03 m/s, 0.1 m/s, 0.17 m/s (mean), 0.19 m/s, 0.25 m/s, 0.3**

107 **m/s, 0.4 m/s, 0.55 for model described in Table S35.**

| Size comparison  | Velocity (m/s) | Odds Ratio | SE    | df  | z-ratio | p-value |
|------------------|----------------|------------|-------|-----|---------|---------|
| 4-8cm / 9-15cm   | 0.011          | 2.469      | 0.558 | Inf | 4.001   | <0.001  |
| 4-8cm / 16-23cm  | 0.011          | 7.151      | 2.563 | Inf | 5.489   | <0.001  |
| 9-15cm / 16-23cm | 0.011          | 2.897      | 1.026 | Inf | 3.002   | 0.008   |

| Size comparison  | Velocity (m/s) | Odds Ratio | SE    | df  | z-ratio | p-value |
|------------------|----------------|------------|-------|-----|---------|---------|
| 4-8cm / 9-15cm   | 0.100          | 2.038      | 0.306 | Inf | 4.733   | <0.001  |
| 4-8cm / 16-23cm  | 0.100          | 4.344      | 1.053 | Inf | 6.060   | <0.001  |
| 9-15cm / 16-23cm | 0.100          | 2.132      | 0.512 | Inf | 3.153   | 0.005   |
| 4-8cm / 9-15cm   | 0.153          | 1.820      | 0.243 | Inf | 4.481   | <0.001  |
| 4-8cm / 16-23cm  | 0.153          | 3.240      | 0.660 | Inf | 5.767   | <0.001  |
| 9-15cm / 16-23cm | 0.153          | 1.780      | 0.358 | Inf | 2.866   | 0.012   |
| 4-8cm / 9-15cm   | 0.190          | 1.680      | 0.237 | Inf | 3.682   | 0.001   |
| 4-8cm / 16-23cm  | 0.190          | 2.632      | 0.527 | Inf | 4.836   | <0.001  |
| 9-15cm / 16-23cm | 0.190          | 1.567      | 0.308 | Inf | 2.286   | 0.058   |
| 4-8cm / 9-15cm   | 0.250          | 1.477      | 0.266 | Inf | 2.168   | 0.077   |
| 4-8cm / 16-23cm  | 0.250          | 1.884      | 0.447 | Inf | 2.673   | 0.021   |
| 9-15cm / 16-23cm | 0.250          | 1.276      | 0.294 | Inf | 1.055   | 0.542   |
| 4-8cm / 9-15cm   | 0.300          | 1.327      | 0.302 | Inf | 1.246   | 0.426   |
| 4-8cm / 16-23cm  | 0.300          | 1.426      | 0.421 | Inf | 1.203   | 0.451   |
| 9-15cm / 16-23cm | 0.300          | 1.075      | 0.308 | Inf | 0.252   | 0.966   |
| 4-8cm / 9-15cm   | 0.400          | 1.071      | 0.362 | Inf | 0.203   | 0.978   |
| 4-8cm / 16-23cm  | 0.400          | 0.817      | 0.362 | Inf | -0.455  | 0.892   |
| 9-15cm / 16-23cm | 0.400          | 0.763      | 0.329 | Inf | -0.627  | 0.805   |
| 4-8cm / 9-15cm   | 0.429          | 1.006      | 0.374 | Inf | 0.016   | 1.000   |
| 4-8cm / 16-23cm  | 0.429          | 0.694      | 0.341 | Inf | -0.743  | 0.738   |
| 9-15cm / 16-23cm | 0.429          | 0.690      | 0.329 | Inf | -0.777  | 0.717   |

108 **Table S37 Model predictions and pairwise comparisons between branched and unbranched rubble (averaged across velocity because there was no interaction between velocity and**  
 109 **branchiness) for model described in Table S35.**

| <b>Branchiness</b>            | <b>Distance transported</b> | <b>SE</b> | <b>df</b> | <b>Lower confidence interval</b> | <b>Upper confidence interval</b> |
|-------------------------------|-----------------------------|-----------|-----------|----------------------------------|----------------------------------|
| Unbranched                    | 0.369                       | 0.040     | Inf       | 0.294                            | 0.451                            |
| Branched                      | 0.256                       | 0.031     | Inf       | 0.200                            | 0.322                            |
| <b>Branchiness comparison</b> | <b>Odds Ratio</b>           | <b>SE</b> | <b>df</b> | <b>z-ratio</b>                   | <b>p-value</b>                   |
| Unbranched / Branched         | 1.703                       | 0.216     | Inf       | 4.200                            | <0.000                           |

110

111 **Table S38 Anova table for model “compnewSLOONLY”.**

| <b>Model term</b>                         | <b>X2</b> | <b>Df</b> | <b>Pr(&gt;X2)</b> |
|-------------------------------------------|-----------|-----------|-------------------|
| fastest_peak_U                            | 45.510    | 1.000     | <0.001            |
| avg_slope_angle_transect.1                | 13.851    | 1.000     | <0.001            |
| fastest_peak_U:avg_slope_angle_transect.1 | 5.585     | 1.000     | 0.018             |

112

113 **Table S39 Pairwise comparisons between three different slope categories and 4 levels of continuous variable ‘velocity’ (0.1 m/s, 0.2 m/s (mean), 0.3 m/s, 0.4 m/s, for model**  
 114 **“compnewSLOONLY”.**

| <b>Slope angle</b> | <b>Velocity</b> | <b>Probability of transport</b> | <b>SE</b> | <b>df</b> | <b>Lower confidence interval</b> | <b>Upper confidence interval</b> |
|--------------------|-----------------|---------------------------------|-----------|-----------|----------------------------------|----------------------------------|
| 3                  | 0.1             | 0.161                           | 0.027     | Inf       | 0.115                            | 0.220                            |
| 13                 | 0.1             | 0.241                           | 0.021     | Inf       | 0.202                            | 0.285                            |
| 22                 | 0.1             | 0.334                           | 0.026     | Inf       | 0.285                            | 0.388                            |
| 3                  | 0.2             | 0.302                           | 0.032     | Inf       | 0.243                            | 0.369                            |
| 13                 | 0.2             | 0.343                           | 0.025     | Inf       | 0.296                            | 0.393                            |

|                         | 22 | 0.2                   | 0.381             | 0.045     | Inf       | 0.298          | 0.471          |
|-------------------------|----|-----------------------|-------------------|-----------|-----------|----------------|----------------|
|                         | 3  | 0.3                   | 0.495             | 0.059     | Inf       | 0.383          | 0.608          |
|                         | 13 | 0.3                   | 0.461             | 0.036     | Inf       | 0.390          | 0.532          |
|                         | 22 | 0.3                   | 0.430             | 0.077     | Inf       | 0.289          | 0.583          |
|                         | 3  | 0.4                   | 0.690             | 0.078     | Inf       | 0.520          | 0.820          |
|                         | 13 | 0.4                   | 0.583             | 0.050     | Inf       | 0.484          | 0.676          |
|                         | 22 | 0.4                   | 0.480             | 0.113     | Inf       | 0.275          | 0.692          |
| <b>Slope comparison</b> |    | <b>Velocity (m/s)</b> | <b>Odds Ratio</b> | <b>SE</b> | <b>df</b> | <b>z-ratio</b> | <b>p-value</b> |
| 3 / 13                  |    | 0.1                   | 0.602             | 0.070     | Inf       | -4.353         | <0.001         |
| 3 / 22                  |    | 0.1                   | 0.381             | 0.084     | Inf       | -4.353         | <0.001         |
| 13 / 22                 |    | 0.1                   | 0.633             | 0.066     | Inf       | -4.353         | <0.001         |
| 3 / 13                  |    | 0.2                   | 0.832             | 0.117     | Inf       | -1.313         | 0.388          |
| 3 / 22                  |    | 0.2                   | 0.704             | 0.188     | Inf       | -1.313         | 0.388          |
| 13 / 22                 |    | 0.2                   | 0.847             | 0.107     | Inf       | -1.313         | 0.388          |
| 3 / 13                  |    | 0.3                   | 1.149             | 0.289     | Inf       | 0.552          | 0.845          |
| 3 / 22                  |    | 0.3                   | 1.302             | 0.622     | Inf       | 0.552          | 0.845          |
| 13 / 22                 |    | 0.3                   | 1.133             | 0.256     | Inf       | 0.552          | 0.845          |
| 3 / 13                  |    | 0.4                   | 1.350             | 0.3473    | 1312      | 1.166          | 0.474          |
| 3 / 22                  |    | 0.4                   | 1.768             | 0.8645    | 1312      | 1.166          | 0.474          |
| 13 / 22                 |    | 0.4                   | 1.310             | 0.3034    | 1312      | 1.166          | 0.474          |

115

116 Table S40 Anova table of model “fi.f.senglob5”.

| <b>Model term</b> | <b>X2</b> | <b>Df</b> | <b>Pr(&gt;X2)</b> |
|-------------------|-----------|-----------|-------------------|
|-------------------|-----------|-----------|-------------------|



|                                               |        |       |        |
|-----------------------------------------------|--------|-------|--------|
| fastest_peak_U                                | 8.178  | 1.000 | 0.004  |
| size_cat_adjusted_to_flume_exp                | 40.585 | 2.000 | <0.001 |
| branched                                      | 28.154 | 1.000 | <0.001 |
| starting_substrate_new                        | 4.989  | 2.000 | 0.083  |
| fastest_peak_U:size_cat_adjusted_to_flume_exp | 7.019  | 2.000 | 0.030  |
| size_cat_adjusted_to_flume_exp:branched       | 8.335  | 2.000 | 0.015  |

117 **Table S41 Pairwise comparisons between branched and unbranched rubble for each level of ‘size’ (4-8 cm, 9-15 cm, 16-23 cm) for model “fi.f.senglob5”.**

| Branchiness contrast  | Velocity (m/s) | Odds Ratio | SE    | df  | z-ratio | p-value |
|-----------------------|----------------|------------|-------|-----|---------|---------|
| Unbranched / Branched | 4-8cm          | 1.794      | 0.382 | Inf | 2.745   | 0.006   |
| Unbranched / Branched | 9-15cm         | 3.833      | 0.958 | Inf | 5.377   | <0.001  |
| Unbranched / Branched | 16-23cm        | 1.148      | 0.475 | Inf | 0.334   | 0.738   |

118

119 **Table S42 Pairwise comparisons between three different rubble size categories for each level of ‘branched’ (branched and unbranched) for model “fi.f.senglob5”.**

| Size comparison  | Branchiness | Odds Ratio | SE    | df  | z-ratio | p-value |
|------------------|-------------|------------|-------|-----|---------|---------|
| 4-8cm / 9-15cm   | Unbranched  | 1.860      | 0.417 | Inf | 2.766   | 0.016   |
| 4-8cm / 16-23cm  | Unbranched  | 4.244      | 1.623 | Inf | 3.781   | <0.001  |
| 9-15cm / 16-23cm | Unbranched  | 2.282      | 0.865 | Inf | 2.177   | 0.075   |
| 4-8cm / 9-15cm   | Branched    | 3.973      | 0.955 | Inf | 5.742   | <0.001  |
| 4-8cm / 16-23cm  | Branched    | 2.716      | 0.789 | Inf | 3.438   | 0.002   |
| 9-15cm / 16-23cm | Branched    | 0.684      | 0.220 | Inf | -1.182  | 0.464   |

120

121 **Table S43 Pairwise comparisons between three different rubble size categories and 8 levels of continuous variable ‘velocity’ (0.03 m/s, 0.1 m/s, 0.17 m/s (mean), 0.19 m/s, 0.25 m/s, 0.3**  
 122 **m/s, 0.4 m/s, 0.55 for model described in Table S37 (“fi.f.senglob5”).**

| Size comparison  | Velocity (m/s) | Odds Ratio | SE    | df  | z-ratio | p-value |
|------------------|----------------|------------|-------|-----|---------|---------|
| 4-8cm / 9-15cm   | 0.100          | 3.116      | 0.586 | Inf | 6.038   | <0.001  |
| 4-8cm / 16-23cm  | 0.100          | 4.306      | 1.256 | Inf | 5.004   | <0.001  |
| 9-15cm / 16-23cm | 0.100          | 1.382      | 0.418 | Inf | 1.069   | 0.533   |
| 4-8cm / 9-15cm   | 0.200          | 2.405      | 0.411 | Inf | 5.136   | <0.001  |
| 4-8cm / 16-23cm  | 0.200          | 2.743      | 0.650 | Inf | 4.259   | <0.001  |
| 9-15cm / 16-23cm | 0.200          | 1.140      | 0.276 | Inf | 0.542   | 0.850   |
| 4-8cm / 9-15cm   | 0.300          | 1.857      | 0.467 | Inf | 2.463   | 0.037   |
| 4-8cm / 16-23cm  | 0.300          | 1.747      | 0.539 | Inf | 1.807   | 0.167   |
| 9-15cm / 16-23cm | 0.300          | 0.941      | 0.292 | Inf | -0.196  | 0.979   |
| 4-8cm / 9-15cm   | 0.400          | 1.433      | 0.531 | Inf | 0.972   | 0.595   |
| 4-8cm / 16-23cm  | 0.400          | 1.112      | 0.501 | Inf | 0.237   | 0.970   |
| 9-15cm / 16-23cm | 0.400          | 0.776      | 0.352 | Inf | -0.559  | 0.842   |

123

124 **Table S44 Anova table of model “flip.compnewSLOONLY”.**

| Model term                                | X2    | Df | Pr(>X2) |
|-------------------------------------------|-------|----|---------|
| fastest_peak_U                            | 7.197 | 1  | 0.007   |
| avg_slope_angle_transect.1                | 0.384 | 1  | 0.536   |
| fastest_peak_U:avg_slope_angle_transect.1 | 0.619 | 1  | 0.431   |

125

126 Table S45 Anova table of model “fi.d.add2”.

| Model term                     | X2     | Df | Pr(>X2) |
|--------------------------------|--------|----|---------|
| fastest_peak_U                 | 12.269 | 1  | <0.001  |
| size_cat_adjusted_to_flume_exp | 3.666  | 2  | 0.1599  |
| branched                       | 0.503  | 1  | 0.478   |
| starting_substrate_new         | 6.152  | 2  | 0.046   |

127 Table S46 Pairwise comparisons between three different substrate categories (hard carbonate, rubble and sand) for model “fi.d.add2”.

| Substrate contrast      | Odds Ratio | SE    | df      | t-ratio | p-value |
|-------------------------|------------|-------|---------|---------|---------|
| Hard carbonate / Rubble | 1.133      | 0.141 | 425.000 | 1.006   | 0.574   |
| Hard carbonate / Sand   | 0.870      | 0.137 | 425.000 | -0.882  | 0.652   |
| Rubble / Sand           | 0.768      | 0.087 | 425.000 | -2.346  | 0.051   |

128 Table S47 Anova table of model “fi.d.sl2”.

| Model term                                | X2     | Df    | Pr(>X2) |
|-------------------------------------------|--------|-------|---------|
| fastest_peak_U                            | 17.271 | 1.000 | <0.001  |
| avg_slope_angle_transect.1                | 7.873  | 1.000 | 0.005   |
| fastest_peak_U:avg_slope_angle_transect.1 | 26.204 | 1.000 | <0.001  |

129

130 Table S48 Predictions for distance of transport for three examples of slope angle, very gentle (3 degrees), moderate (13 degrees) and very strong (22 degrees) for model in Table S43.

| Slope angle | Velocity | Distance transported | SE | df | Lower confidence interval | Upper confidence interval |
|-------------|----------|----------------------|----|----|---------------------------|---------------------------|
|-------------|----------|----------------------|----|----|---------------------------|---------------------------|

|    |     |        |       |     |        |        |
|----|-----|--------|-------|-----|--------|--------|
| 3  | 0.1 | 2.989  | 0.244 | Inf | 2.575  | 3.551  |
| 13 | 0.1 | 3.790  | 0.215 | Inf | 3.406  | 4.257  |
| 22 | 0.1 | 4.902  | 0.331 | Inf | 4.318  | 5.628  |
| 3  | 0.2 | 4.732  | 0.418 | Inf | 4.017  | 5.682  |
| 13 | 0.2 | 4.366  | 0.247 | Inf | 3.923  | 4.899  |
| 22 | 0.2 | 4.075  | 0.393 | Inf | 3.415  | 4.988  |
| 3  | 0.3 | 9.082  | 1.656 | Inf | 6.530  | 13.387 |
| 13 | 0.3 | 5.105  | 0.398 | Inf | 4.411  | 5.993  |
| 22 | 0.3 | 3.461  | 0.482 | Inf | 2.709  | 4.696  |
| 3  | 0.4 | 22.918 | 9.184 | Inf | 11.441 | 55.960 |
| 13 | 0.4 | 6.069  | 0.715 | Inf | 4.886  | 7.765  |
| 22 | 0.4 | 2.996  | 0.524 | Inf | 2.231  | 4.481  |

131

132 **Table S49 Anova table of model “probmove”.**

| <b>Model term</b> | <b><math>\chi^2</math></b> | <b>Df</b> | <b>Pr(&gt;<math>\chi^2</math>)</b> |
|-------------------|----------------------------|-----------|------------------------------------|
| MovementType      | 33.6712023                 | 2         | <0.001                             |

133
